# Supplementary material for: The RNA m6A Reader YTHDF2 Maintains Oncogene Expression and Is a Targetable Dependency in Glioblastoma Stem Cells
Source: Oxford University Press journal article supplement (doi:10.1158/2159-8290.cd-20-0331), 2020-10-06
Supplement: 21598290cd200331-sup-239456_2_supp_6600400_qh5ymw.xlsx [file 21598290cd200331-sup-239456_2_supp_6600400_qh5ymw.xlsx]

## Sheet: Sheet1
Differential m6A Peaks (GSC vs NSC) Positive Fold Change = Increased m6A Signal in GSCs
Peak Number	HGNC_symbol	Gene ID	Chromosome	chromStart	chromEnd	diff.lg.p	diff.log2.fc
1	ACAT1	NM_000019	chr11	107992356	108004549	-2.46	1.39
2	AR	NM_000044	chrX	66948716	66948917	-2.93	-1.12
3	BCHE	NM_000055	chr3	165548300	165548497	-3.84	1.12
4	BCHE	NM_000055	chr3	165547711	165547908	-6.61	1.51
5	CDKN1C	NM_000076	chr11	2906400	2906748	-2.98	1.15
6	SLC26A2	NM_000112	chr5	149366264	149366365	-2.37	1.78
7	EPOR	NM_000121	chr19	11488577	11489176	-3.38	-0.676
8	EXT1	NM_000127	chr8	118811700	118811849	-4.12	-0.988
9	FANCA	NM_000135	chr16	89805628	89806406	-6	2.18
10	NR3C1	NM_000176	chr5	142779399	142779849	-4.8	1.52
11	HK2	NM_000189	chr2	75061129	75081429	-3.17	0.662
12	SGSH	NM_000199	chr17	78183470	78183570	-2.55	1.59
13	SGSH	NM_000199	chr17	78183767	78184559	-7.17	0.889
14	ICAM1	NM_000201	chr19	10395892	10396342	-2.58	-0.504
15	IDS	NM_000202	chrX	148564401	148568457	-2.62	-0.557
16	MSH2	NM_000251	chr2	47630304	47630502	-2.25	0.986
17	NF2	NM_000268	chr22	30091051	30091600	-6.89	1.28
18	PMM2	NM_000303	chr16	8942501	8942749	-2.79	1.09
19	CTSA	NM_000308	chr20	44520220	44520574	-3.96	1.28
20	PRNP	NM_000311	chr20	4680886	4680987	-2.18	0.571
21	STS	NM_000351	chrX	7268198	7268449	-5.13	0.281
22	TIMP3	NM_000362	chr22	33197748	33253292	-2.6	1.03
23	TSC1	NM_000368	chr9	135766883	135767233	-2.58	-0.769
24	MID1	NM_000381	chrX	10414244	10414543	-6.17	-0.976
25	MID1	NM_000381	chrX	10534993	10535093	-2.4	-0.552
26	EXT2	NM_000401	chr11	44129502	44129749	-3.91	-1.04
27	EXT2	NM_000401	chr11	44265844	44266339	-4.12	-0.716
28	KRT10	NM_000421	chr17	38974716	38975220	-3.34	1.07
29	PLEC	NM_000445	chr8	144998194	144998395	-9.12	1.4
30	PLEC	NM_000445	chr8	144997098	144997298	-3.01	0.657
31	PLEC	NM_000445	chr8	144993899	144994997	-15.4	1.02
32	PLEC	NM_000445	chr8	144992404	144992904	-4.18	1.17
33	PLEC	NM_000445	chr8	144995793	144996343	-8.12	0.584
34	PLEC	NM_000445	chr8	144995395	144995695	-7.21	0.809
35	STK11	NM_000455	chr19	1205847	1207187	-4.6	1.03
36	ATRX	NM_000489	chrX	76938321	76938572	-2.22	0.72
37	ATRX	NM_000489	chrX	76937075	76937325	-4.22	-1.06
38	PMS1	NM_000534	chr2	190719303	190719453	-3.24	1.53
39	IL6R	NM_000565	chr1	154438049	154438348	-2.21	0.398
40	IGFBP5	NM_000599	chr2	217539023	217539473	-2.56	-0.183
41	CD59	NM_000611	chr11	33738950	33744007	-2.82	0.781
42	BCL2	NM_000633	chr18	60794173	60794823	-2.78	-0.249
43	ADORA2B	NM_000676	chr17	15878267	15878367	-3.82	0.879
44	ALDH1B1	NM_000692	chr9	38395741	38395840	-4.76	1.34
45	CACNB3	NM_000725	chr12	49221493	49221740	-2.37	-0.614
46	COMT	NM_000754	chr22	19957252	19957351	-3.54	1.52
47	CSF1	NM_000757	chr1	110465975	110466474	-3.5	0.7
48	CYP51A1	NM_000786	chr7	91763543	91763741	-2.79	0.915
49	KITLG	NM_000899	chr12	88890563	88890814	-434	0.428
50	OPRL1	NM_000913	chr20	62730118	62731156	-5.05	0.599
51	OPRL1	NM_000913	chr20	62731501	62731650	-4.37	2.88
52	PLOD2	NM_000935	chr3	145788426	145788626	-2.22	0.744
53	RARA	NM_000964	chr17	38487241	38487590	-2.56	1.38
54	RPL36AL	NM_001001	chr14	50085453	50085838	-2.7	-0.511
55	BLOC1S2	NM_001001342	chr10	102034905	102035004	-2.27	-0.943
56	SMAD5	NM_001001419	chr5	135489303	135489754	-2.21	0.507
57	SMAD5	NM_001001420	chr5	135468633	135489762	-2.85	0.52
58	GRB10	NM_001001550	chr7	50660350	50660551	-4.3	-0.819
59	GGA1	NM_001001560	chr22	38028821	38029221	-10.5	1.55
60	ZNF470	NM_001001668	chr19	57088918	57089119	-4.08	-2.21
61	PIM3	NM_001001852	chr22	50356778	50356977	-2.96	-0.921
62	PPARA	NM_001001928	chr22	46631083	46631582	-4.59	0.773
63	AFAP1L2	NM_001001936	chr10	116055631	116055732	-2.83	1.52
64	C9orf47	NM_001001938	chr9	91606455	91606555	-4.27	-1.66
65	GPM6B	NM_001001994	chrX	13803896	13956744	-2.39	1
66	CLDN18	NM_001002026	chr3	137742576	137743461	-3.34	-1.66
67	ZFYVE27	NM_001002261	chr10	99519234	99519580	-3.34	1.43
68	ZFYVE27	NM_001002262	chr10	99519323	99519572	-2.88	1.4
69	WNK3	NM_001002838	chrX	54275428	54275529	-3.03	-1.89
70	BICD1	NM_001003398	chr12	32259790	32260139	-2.38	0.844
71	HMGXB4	NM_001003681	chr22	35660805	35661204	-2.59	0.975
72	RREB1	NM_001003698	chr6	7230530	7231377	-9.06	1.55
73	RREB1	NM_001003698	chr6	7231775	7247338	-2.19	0.61
74	RREB1	NM_001003699	chr6	7230485	7231384	-8	1.52
75	RREB1	NM_001003699	chr6	7231732	7232132	-4.97	1.23
76	RREB1	NM_001003700	chr6	7231732	7232132	-4.99	1.23
77	RREB1	NM_001003700	chr6	7230485	7231384	-7.77	1.52
78	MTFP1	NM_001003704	chr22	30824642	30824991	-2.95	0.638
79	ATP5J2	NM_001003713	chr7	99056869	99057791	-3.01	0.199
80	RECQL5	NM_001003715	chr17	73657132	73658891	-5.27	-1.41
81	RECQL5	NM_001003716	chr17	73657143	73658897	-4.99	-1.45
82	BICD2	NM_001003800	chr9	95477224	95477673	-12.4	-1.88
83	BICD2	NM_001003800	chr9	95481092	95481193	-2.91	1.36
84	BICD2	NM_001003800	chr9	95481440	95481690	-3.14	0.6
85	GPRASP2	NM_001004051	chrX	101969595	101969793	-2.7	-1.01
86	QSOX1	NM_001004128	chr1	180124116	180135634	-3.46	1.06
87	NRARP	NM_001004354	chr9	140195417	140196654	-2.67	0.367
88	NCK2	NM_001004720	chr2	106510091	106510288	-3.4	-0.917
89	KDM2B	NM_001005366	chr12	121867695	121868172	-4.09	-1.17
90	CACNA1H	NM_001005407	chr16	1270227	1270527	-3.17	-0.495
91	ZNF780B	NM_001005851	chr19	40539294	40539494	-3.1	-1.26
92	ERBB2	NM_001005862	chr17	37884019	37884766	-5.57	-0.655
93	TSPAN17	NM_001006616	chr5	176084560	176085061	-2.7	0.52
94	SLC25A25	NM_001006641	chr9	130869888	130870089	-2.33	0.588
95	IGSF3	NM_001007237	chr1	117117318	117117518	-2.49	-1.44
96	IRGQ	NM_001007561	chr19	44090216	44090416	-3.41	-1.25
97	IRGQ	NM_001007561	chr19	44096207	44100187	-2.65	-0.326
98	GPX8	NM_001008397	chr5	54461982	54462083	-2.53	-0.609
99	TMEM64	NM_001008495	chr8	91637947	91643786	-2.77	1.59
100	SLC7A2	NM_001008539	chr8	17422598	17422848	-3.26	0.55
101	TPST2	NM_001008566	chr22	26936813	26937254	-3.25	-1.02
102	LPHN1	NM_001008701	chr19	14261332	14261781	-3.83	0.747
103	LPHN1	NM_001008701	chr19	14272302	14272403	-2.36	0.999
104	FNIP1	NM_001008738	chr5	131007452	131007702	-3.89	1.21
105	MFAP3L	NM_001009554	chr4	170912584	170913034	-4.18	0.718
106	ZNF655	NM_001009960	chr7	99170007	99170256	-3.67	1.32
107	PM20D2	NM_001010853	chr6	89855867	89856017	-4.17	1.25
108	RNF187	NM_001010858	chr1	228681850	228682199	-5.01	-0.837
109	ZNF780A	NM_001010880	chr19	40579643	40580041	-6.61	-1.49
110	ACER2	NM_001010887	chr9	19451221	19451714	-4.34	-0.562
111	RAP1B	NM_001010942	chr12	69004767	69042523	-2.27	0.793
112	AR	NM_001011645	chrX	66948718	66948918	-3.15	-1.28
113	ZMAT1	NM_001011657	chrX	101138903	101139203	-3.36	-0.811
114	NAA30	NM_001011713	chr14	57857369	57858317	-4.47	0.751
115	FOXP4	NM_001012426	chr6	41514213	41514564	-2.46	-0.298
116	FOXP4	NM_001012427	chr6	41514213	41514414	-2.31	-0.449
117	CTBP1	NM_001012614	chr4	1205773	1206022	-2.82	-0.596
118	SLC3A2	NM_001012662	chr11	62656155	62656255	-3.09	-0.705
119	SLC3A2	NM_001012664	chr11	62655962	62656257	-5.28	-1.04
120	AGPAT2	NM_001012727	chr9	139581668	139581814	-3.42	1.36
121	AGPAT2	NM_001012727	chr9	139567642	139568224	-5.52	0.56
122	ZKSCAN2	NM_001012981	chr16	25247470	25247571	-5.04	-2.92
123	C16orf86	NM_001012984	chr16	67700814	67701926	-4.22	0.783
124	SLC3A2	NM_001013251	chr11	62655958	62656256	-4.93	-1.04
125	C12orf68	NM_001013635	chr12	48578512	48578762	-16	-1.91
126	C2orf68	NM_001013649	chr2	85838790	85839129	-2.7	-0.866
127	C2orf68	NM_001013649	chr2	85834953	85835351	-3.41	-0.856
128	PLIN5	NM_001013706	chr19	4523439	4523888	-2.5	-0.566
129	ANXA2R	NM_001014279	chr5	43039716	43039912	-3.65	0.323
130	DCUN1D2	NM_001014283	chr13	114138213	114145023	-3.11	1.47
131	AKT1	NM_001014432	chr14	105259008	105261982	-3.18	1.3
132	DBNL	NM_001014436	chr7	44084387	44091441	-2.72	1.08
133	ZNF638	NM_001014972	chr2	71576913	71577162	-2.92	-0.995
134	BAG5	NM_001015048	chr14	104026128	104026729	-2.54	0.896
135	BAG5	NM_001015049	chr14	104026150	104026746	-3.32	0.989
136	UFSP1	NM_001015072	chr7	100486642	100487190	-4.45	0.572
137	NHLRC3	NM_001017370	chr13	39622567	39622716	-2.16	-0.867
138	SP3	NM_001017371	chr2	174820922	174828649	-2.68	0.959
139	SUGP2	NM_001017392	chr19	19119221	19121048	-7.14	-1.36
140	SUGP2	NM_001017392	chr19	19103894	19103995	-3.28	1.99
141	SIRT3	NM_001017524	chr11	215669	215866	-3.47	-1.67
142	RCCD1	NM_001017919	chr15	91503725	91504964	-2.16	1.13
143	ZHX1	NM_001017926	chr8	124265671	124265920	-2.25	0.682
144	OS9	NM_001017958	chr12	58114648	58114945	-2.55	-0.908
145	KIAA2026	NM_001017969	chr9	6007207	6007655	-2.42	0.675
146	SH3PXD2B	NM_001017995	chr5	171766135	171766784	-3.08	0.486
147	SFMBT2	NM_001018039	chr10	7202179	7202429	-4.95	0.482
148	DKK3	NM_001018057	chr11	11984790	11984890	-3.79	-1.25
149	NR3C1	NM_001018074	chr5	142779383	142779732	-5.19	1.65
150	NR3C1	NM_001018075	chr5	142779384	142779833	-4.84	1.53
151	NR3C1	NM_001018076	chr5	142779527	142779876	-5.58	1.84
152	NR3C1	NM_001018077	chr5	142779401	142779851	-4.71	1.52
153	PODXL	NM_001018111	chr7	131195701	131195952	-2.24	-0.261
154	NR3C1	NM_001020825	chr5	142779362	142779808	-5.13	1.44
155	NR3C1	NM_001024094	chr5	142779398	142779848	-5.05	1.54
156	BAALC	NM_001024372	chr8	104153019	104153219	-2.81	1.02
157	NAV3	NM_001024383	chr12	78513344	78513544	-5.02	1.93
158	NAV3	NM_001024383	chr12	78400392	78400592	-3.45	1.5
159	SBK1	NM_001024401	chr16	28330398	28331776	-2.21	-0.344
160	RUNX2	NM_001024630	chr6	45296152	45296452	-2.16	-1.74
161	LRRC24	NM_001024678	chr8	145747809	145749543	-2.95	-0.587
162	CD276	NM_001024736	chr15	74005528	74005775	-4.63	-0.907
163	ADAR	NM_001025107	chr1	154574878	154600356	-2.47	1.08
164	VEGFA	NM_001025366	chr6	43738291	43739034	-7.69	0.945
165	VEGFA	NM_001025367	chr6	43738294	43739043	-7.96	0.958
166	VEGFA	NM_001025368	chr6	43738294	43739042	-8.04	0.954
167	VEGFA	NM_001025369	chr6	43738290	43739031	-7.46	0.939
168	VEGFA	NM_001025370	chr6	43738340	43739032	-10.5	0.997
169	TTLL3	NM_001025930	chr3	9877346	9877743	-6.8	-1.4
170	TTLL3	NM_001025930	chr3	9876517	9877001	-4.19	-0.955
171	SLC35F1	NM_001029858	chr6	118228737	118475630	-2.6	-0.485
172	SFMBT2	NM_001029880	chr10	7202180	7202430	-4.47	0.401
173	AHDC1	NM_001029882	chr1	27885342	27930005	-3.2	2.07
174	PLEKHG1	NM_001029884	chr6	151152083	151152234	-2.29	-0.531
175	CTNS	NM_001031681	chr17	3558563	3559798	-6.02	-2.55
176	FAM131B	NM_001031690	chr7	143052829	143053974	-5.82	-0.333
177	INF2	NM_001031714	chr14	105180771	105181168	-7.09	0.648
178	MAF	NM_001031804	chr16	79634073	79634423	-2.49	0.221
179	MAF	NM_001031804	chr16	79633275	79633874	-3.43	0.643
180	STXBP1	NM_001032221	chr9	130374635	130413897	-3.18	1.25
181	TMPO	NM_001032283	chr12	98941718	98941918	-3.92	0.999
182	UBE2V1	NM_001032288	chr20	48697954	48698249	-2.52	-0.737
183	MTERFD3	NM_001033050	chr12	107371863	107372361	-2.87	-0.817
184	MAGI1	NM_001033057	chr3	65415350	65415649	-2.15	-0.295
185	NGRN	NM_001033088	chr15	90814693	90815293	-2.57	-0.619
186	SRGAP3	NM_001033117	chr3	9026369	9026570	-3.55	-1.09
187	WIPI2	NM_001033518	chr7	5272841	5273387	-7.62	-0.801
188	WIPI2	NM_001033518	chr7	5272149	5272248	-5.33	-2.4
189	WIPI2	NM_001033519	chr7	5272150	5272250	-5.27	-2.19
190	WIPI2	NM_001033519	chr7	5272793	5273387	-8.34	-0.946
191	WIPI2	NM_001033520	chr7	5272137	5272338	-6.65	-2.21
192	WIPI2	NM_001033520	chr7	5272786	5273386	-8.39	-0.921
193	WIPI2	NM_001033520	chr7	5271188	5271389	-2.48	-0.968
194	PRKCZ	NM_001033581	chr1	2116075	2116495	-3.92	-1.93
195	PRKCZ	NM_001033582	chr1	2116074	2116494	-3.95	-1.93
196	VEGFA	NM_001033756	chr6	43738292	43739037	-7.65	0.925
197	ERP29	NM_001034025	chr12	112460234	112460481	-6.77	-0.697
198	ITPRIPL2	NM_001034841	chr16	19125303	19127753	-9.08	0.725
199	FAM134B	NM_001034850	chr5	16474887	16475037	-16	1.85
200	SMOC1	NM_001034852	chr14	70498782	70498883	-2.79	-1.01
201	FAM102A	NM_001035254	chr9	130704990	130705337	-2.53	0.949
202	FAM102A	NM_001035254	chr9	130742415	130742762	-2.2	0.847
203	ARL4A	NM_001037164	chr7	12728220	12728469	-434	0.524
204	FOXK1	NM_001037165	chr7	4802031	4803331	-5.59	0.489
205	TRIM16L	NM_001037330	chr17	18638482	18638633	-3.18	1.65
206	HELZ2	NM_001037335	chr20	62193950	62196041	-5.87	0.788
207	HELZ2	NM_001037335	chr20	62196487	62197334	-3.88	0.439
208	HELZ2	NM_001037335	chr20	62196139	62196289	-2.81	1.22
209	NCKAP5L	NM_001037806	chr12	50185478	50185729	-2.23	-0.68
210	SLC38A10	NM_001037984	chr17	79218709	79219009	-5.33	-1.2
211		NM_001039127	chr4	155770	156068	-2.39	1.25
212	TRIOBP	NM_001039141	chr22	38120940	38121491	-2.22	-0.355
213	TRIOBP	NM_001039141	chr22	38130519	38131270	-8.91	-0.953
214	KCNC4	NM_001039574	chr1	110753585	110753935	-4.84	0.598
215	KCNC4	NM_001039574	chr1	110754584	110754685	-3.73	3.25
216	C15orf59	NM_001039614	chr15	74032291	74032938	-5.1	-0.139
217	CREBZF	NM_001039618	chr11	85374636	85375983	-2.77	0.295
218	UNC45A	NM_001039675	chr15	91478821	91478921	-5.06	1.76
219	CHIC1	NM_001039840	chrX	72906446	72906695	-2.17	0.147
220	OXLD1	NM_001039842	chr17	79632160	79633572	-8.02	0.977
221	FKRP	NM_001039885	chr19	47258705	47261187	-6.77	-0.0279
222	C19orf55	NM_001039887	chr19	36259677	36259828	-3.16	-0.853
223	ANKRD34A	NM_001039888	chr1	145474063	145474410	-7.72	1.25
224	MLLT4	NM_001040000	chr6	168352101	168363500	-4.35	-0.31
225	SIRPA	NM_001040022	chr20	1918810	1919008	-5.42	1.05
226	SIRPA	NM_001040023	chr20	1918807	1919006	-6.08	1.03
227	PALM	NM_001040134	chr19	746934	747184	-3.75	-0.97
228	PALM	NM_001040134	chr19	746385	746536	-3.1	-0.912
229	TYSND1	NM_001040273	chr10	71899128	71899626	-2.25	0.454
230	CD83	NM_001040280	chr6	14135812	14136208	-2.4	0.2
231	MAPK8IP3	NM_001040439	chr16	1819424	1819624	-2.15	-0.0325
232	ASB1	NM_001040445	chr2	239355199	239355400	-3.58	-1.55
233	INCENP	NM_001040694	chr11	61912721	61917583	-6.92	-0.584
234	INCENP	NM_001040694	chr11	61891594	61896250	-3.55	0.825
235	PGP	NM_001042371	chr16	2263244	2263643	-4.73	-0.964
236	WHSC1	NM_001042424	chr4	1983036	1983187	-5.79	-1.84
237	WHSC1	NM_001042424	chr4	1902703	1902953	-3.99	-0.726
238	SUMF2	NM_001042469	chr7	56147433	56147581	-2.29	0.417
239	SUMF2	NM_001042470	chr7	56132062	56136263	-2.79	1.13
240	ZNF565	NM_001042474	chr19	36673848	36674193	-2.98	-0.481
241	C2orf88	NM_001042519	chr2	191064822	191065023	-2.56	0.216
242	C2orf88	NM_001042521	chr2	191064849	191064999	-3.05	0.676
243	SPRED3	NM_001042522	chr19	38886742	38887042	-2.68	-0.268
244	AGAP3	NM_001042535	chr7	150819937	150820282	-2.96	0.688
245	MAZ	NM_001042539	chr16	29818055	29818487	-4.74	0.831
246	FRS2	NM_001042555	chr12	69967998	69968795	-3.06	-0.257
247	TMEM8B	NM_001042589	chr9	35853894	35854145	-3.67	-0.637
248	TMEM8B	NM_001042590	chr9	35853898	35854148	-3.91	-0.677
249	ERBB4	NM_001042599	chr2	212248374	212248574	-8.26	0.0195
250	ERBB4	NM_001042599	chr2	212246977	212247177	-9.21	-1.43
251	ERBB4	NM_001042599	chr2	212989607	213403352	-10.3	-2.51
252	SNX21	NM_001042632	chr20	44469391	44470035	-7.74	1.1
253	SNX21	NM_001042633	chr20	44469377	44470124	-8.22	1.12
254	ZSWIM7	NM_001042697	chr17	15880070	15880315	-2.39	-0.705
255	ZSWIM7	NM_001042698	chr17	15880071	15880319	-2.6	-0.635
256	ELMSAN1	NM_001043318	chr14	74206168	74253861	-2.87	0.354
257	ELMSAN1	NM_001043318	chr14	74203959	74205969	-3.51	0.826
258	TNFRSF1B	NM_001066	chr1	12268829	12268929	-2.87	1.28
259	TUBG1	NM_001070	chr17	40766962	40767207	-4.16	-0.811
260	QSER1	NM_001076786	chr11	32975571	32975721	-2.17	-0.899
261	ZNF436	NM_001077195	chr1	23689084	23689335	-3.27	1.51
262	NCOR2	NM_001077261	chr12	124809256	124809656	-2.68	-0.521
263	ZNF682	NM_001077349	chr19	20117648	20117896	-4.12	-0.0104
264	RBM23	NM_001077352	chr14	23370343	23370492	-2.81	-1.11
265	IRF2BP2	NM_001077397	chr1	234742743	234745221	-2.61	0.116
266	TNFAIP8	NM_001077654	chr5	118729027	118729370	-7.67	1.48
267	URGCP	NM_001077663	chr7	43916582	43916830	-2.65	1.05
268	URGCP	NM_001077663	chr7	43917870	43918118	-2.36	1.12
269	URGCP	NM_001077663	chr7	43917077	43917722	-7.23	1.17
270	URGCP	NM_001077664	chr7	43917882	43918132	-2.56	1.15
271	URGCP	NM_001077664	chr7	43917085	43917734	-5.56	1.13
272	URGCP	NM_001077664	chr7	43916587	43916837	-2.8	1.19
273	SRSF1	NM_001078166	chr17	56081025	56081326	-4.12	-0.595
274	FAM127A	NM_001078171	chrX	134166431	134167376	-8.53	0.375
275	UBN1	NM_001079514	chr16	4902898	4903099	-2.24	0.797
276	MED24	NM_001079518	chr17	38175749	38175850	-2.66	-1.36
277	IKZF2	NM_001079526	chr2	213872053	213872304	-3.74	-0.282
278	DIAPH1	NM_001079812	chr5	140966723	140998523	-2.65	1.11
279	ITGA6	NM_001079818	chr2	173368997	173369395	-2.18	0.905
280	ZNF331	NM_001079906	chr19	54080288	54080836	-2.62	0.152
281	FAM155A	NM_001080396	chr13	107822807	107822956	-5.3	-0.815
282	FAM155A	NM_001080396	chr13	108518124	108518669	-434	-1.76
283	CCDC88C	NM_001080414	chr14	91738515	91738716	-4.54	-1.33
284	ZNF629	NM_001080417	chr16	30795522	30795778	-2.98	1.62
285	TOX3	NM_001080430	chr16	52473599	52473749	-4.57	-1.15
286	SLC45A4	NM_001080431	chr8	142220854	142221254	-4.14	-0.686
287	LMTK3	NM_001080434	chr19	49000683	49001728	-6.41	-0.19
288	BEND3	NM_001080450	chr6	107390111	107390510	-3.5	1.49
289	TENM3	NM_001080477	chr4	183720878	183722128	-2.98	0.0622
290	C9orf172	NM_001080482	chr9	139740563	139741156	-5.45	1.17
291	C9orf172	NM_001080482	chr9	139741253	139741501	-4.03	1.21
292	C9orf172	NM_001080482	chr9	139741648	139741797	-2.29	1.17
293	TNRC18	NM_001080495	chr7	5417612	5428955	-3.89	0.678
294	MEGF9	NM_001080497	chr9	123476069	123476666	-7.43	1.33
295	DGKG	NM_001080744	chr3	185865736	185866085	-11.2	-0.675
296	DGKG	NM_001080744	chr3	185867528	185867629	-3.37	0.276
297	DGKG	NM_001080745	chr3	185865737	185866087	-11.2	-0.675
298	DGKG	NM_001080745	chr3	185867532	185867633	-3.3	0.276
299	TMEM120B	NM_001080825	chr12	122217039	122217338	-6.22	2
300		NM_001080826	chr8	8234367	8234467	-2.68	1.4
301	DSE	NM_001080976	chr6	116757417	116758361	-3.49	-0.196
302	DSE	NM_001080976	chr6	116756870	116757119	-4.59	-1.8
303	COMMD5	NM_001081003	chr8	146075897	146078765	-2.3	0.802
304	COMMD5	NM_001081004	chr8	146075888	146078404	-2.32	0.75
305	JMJD6	NM_001081461	chr17	74721792	74722782	-3.82	1.18
306	RBFOX2	NM_001082578	chr22	36424334	36424485	-2.66	1.51
307	RBFOX2	NM_001082579	chr22	36424335	36424485	-2.66	1.51
308	PDE5A	NM_001083	chr4	120528109	120528210	-3.42	-1.83
309	DNAAF2	NM_001083908	chr14	50092731	50100613	-8.05	1.12
310	WBP1L	NM_001083913	chr10	104574733	104575229	-3.48	-0.641
311	ZNF655	NM_001083956	chr7	99169982	99170232	-4.35	1.28
312	ZNF655	NM_001085368	chr7	99170002	99170251	-4.14	1.32
313	ARSA	NM_001085427	chr22	51063611	51063711	-2.15	-1.36
314	CTNND1	NM_001085458	chr11	57569377	57569578	-4.96	-1.16
315	CTNND1	NM_001085459	chr11	57569372	57569572	-4.54	-1.18
316	CTNND1	NM_001085460	chr11	57569392	57569592	-5.07	-1.08
317	CTNND1	NM_001085461	chr11	57569375	57569576	-4.57	-1.13
318	CTNND1	NM_001085462	chr11	57569407	57569606	-4.47	-0.951
319	CTNND1	NM_001085463	chr11	57569401	57569601	-4.96	-0.985
320	CTNND1	NM_001085464	chr11	57569397	57569597	-5.39	-1.04
321	CTNND1	NM_001085465	chr11	57569405	57569606	-4.34	-0.96
322	CTNND1	NM_001085466	chr11	57569404	57569604	-4.84	-1
323	CTNND1	NM_001085467	chr11	57569382	57569582	-5.43	-1.15
324	CTNND1	NM_001085468	chr11	57569400	57569600	-5.23	-1.02
325	CTNND1	NM_001085469	chr11	57569378	57569579	-5.36	-1.19
326	ABR	NM_001092	chr17	908941	909339	-4.62	-0.357
327	SLC35G2	NM_001097600	chr3	136574035	136574285	-3.71	-1.31
328	CRTC1	NM_001098482	chr19	18886600	18888399	-4.16	-1.02
329	ZNF419	NM_001098491	chr19	58004323	58004471	-4.32	-1.35
330	ZNF419	NM_001098493	chr19	58005652	58005801	-2.21	-1.23
331	ZNF419	NM_001098493	chr19	58004317	58004466	-4.36	-1.36
332	ZNF419	NM_001098494	chr19	58004323	58004472	-4.38	-1.42
333	ZNF419	NM_001098496	chr19	58004317	58004466	-4.3	-1.36
334	ZNF419	NM_001098496	chr19	58005652	58005801	-2.21	-1.23
335	PWWP2B	NM_001098637	chr10	134218417	134230572	-4.82	0.795
336	SEPT8	NM_001098811	chr5	132101139	132112868	-3.24	2.19
337	SEPT8	NM_001098812	chr5	132101140	132112868	-3.74	2.05
338	SEPT8	NM_001098813	chr5	132101166	132113412	-2.75	1.97
339	ZBTB34	NM_001099270	chr9	129642239	129642489	-2.66	0.995
340	BTBD9	NM_001099272	chr6	38141225	38141326	-2.5	-2.03
341	TMEM100	NM_001099640	chr17	53797721	53797820	-2.8	0.879
342	LRRN3	NM_001099658	chr7	110764963	110765360	-2.43	0.924
343	LRRN3	NM_001099658	chr7	110762682	110762832	-2.77	-0.718
344	LRRN3	NM_001099660	chr7	110762676	110762826	-2.2	-0.31
345	LRRN3	NM_001099660	chr7	110764962	110765360	-2.69	0.833
346	LRRC58	NM_001099678	chr3	120049910	120050061	-3.38	1.9
347	C19orf60	NM_001100418	chr19	18699689	18700315	-2.49	0.859
348	C19orf60	NM_001100419	chr19	18699685	18700325	-2.16	0.813
349	SNRK	NM_001100594	chr3	43344772	43345070	-2.87	1.55
350	KDELR2	NM_001100603	chr7	6523651	6523751	-2.28	0.758
351	CABLES1	NM_001100619	chr18	20837411	20837660	-2.4	0.305
352	TMEM55B	NM_001100814	chr14	20929371	20929521	-2.88	1.19
353	FOXRED2	NM_001102371	chr22	36902065	36903098	-5.35	0.55
354	FOXRED2	NM_001102371	chr22	36885965	36886265	-4.73	1.45
355	ZFAND5	NM_001102420	chr9	74979963	74980064	-3.13	1.54
356	ZFAND5	NM_001102421	chr9	74979963	74980063	-3.13	1.54
357	SNX18	NM_001102575	chr5	53815232	53839385	-6.87	1.03
358	SNX18	NM_001102575	chr5	53813642	53814140	-9.37	1.49
359	ZNF160	NM_001102603	chr19	53572806	53573106	-2.82	-0.722
360	ZNF160	NM_001102603	chr19	53573204	53573405	-3.62	-1.08
361	FMN1	NM_001103184	chr15	33065067	33065168	-3.79	1.16
362	C4orf19	NM_001104629	chr4	37592490	37592591	-3.03	0.236
363	C4orf19	NM_001104629	chr4	37591893	37592093	-7.32	0.745
364	PDE4D	NM_001104631	chr5	58270449	58270749	-15.2	-1.6
365	TLE3	NM_001105192	chr15	70389308	70390156	-4.48	0.665
366	ZBTB10	NM_001105539	chr8	81398497	81412050	-4.66	0.915
367	NUDT19	NM_001105570	chr19	33182915	33183510	-10.3	1.56
368	ACVR2B	NM_001106	chr3	38525006	38525655	-2.53	-0.465
369	RNFT2	NM_001109903	chr12	117290186	117290587	-5.35	-0.865
370	ADAR	NM_001111	chr1	154574910	154580475	-2.18	1.03
371	NAV2	NM_001111018	chr11	20139905	20140355	-3.42	-0.534
372	NAV2	NM_001111019	chr11	20139904	20140354	-3.05	-0.567
373	PDE4A	NM_001111307	chr19	10577618	10578366	-2.81	0.647
374	PDE4A	NM_001111308	chr19	10577611	10578360	-2.19	0.616
375	PDE4A	NM_001111309	chr19	10577614	10578363	-2.67	0.65
376	DDX54	NM_001111322	chr12	113596371	113596670	-2.32	-0.753
377	ZSCAN30	NM_001112734	chr18	32833765	32834215	-2.43	-0.454
378	KCNC1	NM_001112741	chr11	17757643	17758092	-4.21	3.14
379	KCNC1	NM_001112741	chr11	17793730	17794129	-434	-2.9
380	ECE1	NM_001113349	chr1	21544337	21544887	-2.32	-0.766
381	SEPT9	NM_001113493	chr17	75398275	75398376	-2.63	0.858
382	SEPT9	NM_001113494	chr17	75398273	75398373	-2.81	0.907
383	ARHGEF7	NM_001113511	chr13	111806275	111811411	-2.36	1.4
384	ZNF276	NM_001113525	chr16	89805642	89806140	-11.3	1.78
385	ZNF276	NM_001113525	chr16	89806636	89806835	-3.49	0.958
386	THUMPD3	NM_001114092	chr3	9413010	9413160	-2.64	-0.0754
387	C17orf85	NM_001114118	chr17	3715582	3715933	-434	0.537
388	CLCN7	NM_001114331	chr16	1495675	1496219	-3.46	0.454
389	PLAG1	NM_001114634	chr8	57079302	57079952	-13.1	-0.936
390	PLAG1	NM_001114634	chr8	57073966	57074116	-4.17	-0.565
391	PLAG1	NM_001114635	chr8	57073965	57074165	-4.8	-1
392	PLAG1	NM_001114635	chr8	57079294	57079943	-14.1	-1.1
393	PRRT4	NM_001114726	chr7	127991275	127991376	-4.02	0.0704
394	ADCY9	NM_001116	chr16	4165333	4165887	-6.99	1.34
395	ADCY9	NM_001116	chr16	4164735	4165035	-2.47	1.12
396	CDKN1C	NM_001122630	chr11	2906484	2906946	-2.7	1.13
397	SH3BP2	NM_001122681	chr4	2835598	2835749	-2.96	1.03
398	AGAP2	NM_001122772	chr12	58119622	58120321	-14	-1.21
399	AGAP2	NM_001122772	chr12	58121740	58122123	-12.1	5.09
400	AGAP2	NM_001122772	chr12	58130980	58131929	-9.72	-0.447
401	NCOA7	NM_001122842	chr6	126210258	126211006	-5.45	0.813
402	NCOA7	NM_001122842	chr6	126249988	126250089	-3.64	1.81
403	DBNL	NM_001122956	chr7	44084386	44091438	-2.61	0.998
404	BCKDK	NM_001122957	chr16	31123322	31123520	-3.86	-1.4
405	SMEK2	NM_001122964	chr2	55844561	55844810	-2.87	0.772
406	KLLN	NM_001126049	chr10	89620707	89620957	-5.76	-1.63
407	TP73	NM_001126240	chr1	3649931	3650379	-6.29	1.8
408	TP73	NM_001126241	chr1	3649928	3650377	-6.11	1.78
409	TP73	NM_001126242	chr1	3649931	3650330	-5.71	1.65
410	AP1B1	NM_001127	chr22	29759069	29784473	-2.97	1.21
411	KIAA1598	NM_001127211	chr10	118645220	118645419	-3.16	1.5
412	KIAA1598	NM_001127211	chr10	118645766	118645965	-3.04	1.23
413	CD59	NM_001127223	chr11	33738966	33744024	-3.11	0.795
414	CD59	NM_001127225	chr11	33738959	33744123	-2.38	0.752
415	CD59	NM_001127226	chr11	33738944	33744223	-3.95	0.842
416	CD59	NM_001127227	chr11	33738988	33744498	-3.34	0.814
417	BBC3	NM_001127240	chr19	47724770	47725166	-2.26	-0.402
418	BBC3	NM_001127241	chr19	47724773	47725122	-3.64	-0.216
419	TMEM129	NM_001127266	chr4	1719357	1720083	-4.02	-1.29
420	SPRY4	NM_001127496	chr5	141690889	141691090	-4.59	-1.04
421	SPRY4	NM_001127496	chr5	141690390	141690591	-2.34	-0.869
422	PEX26	NM_001127649	chr22	18561056	18561354	-2.6	0.711
423	CTSA	NM_001127695	chr20	44520029	44520576	-4.25	1.34
424	HIVEP3	NM_001127714	chr1	41976174	41976524	-7.69	0.174
425	HIVEP3	NM_001127714	chr1	41978674	41978874	-5.74	-0.424
426	HIVEP3	NM_001127714	chr1	41979073	41979273	-5.7	1.28
427	SALL1	NM_001127892	chr16	51175628	51175827	-2.41	-0.817
428	ZEB1	NM_001128128	chr10	31815906	31816205	-2.25	-0.522
429	PMS1	NM_001128143	chr2	190719312	190719461	-3.2	1.55
430	PMS1	NM_001128144	chr2	190719309	190719460	-2.91	1.48
431	PSIP1	NM_001128217	chr9	15510177	15510917	-3.8	1.02
432	MAPKBP1	NM_001128608	chr15	42115941	42118003	-3.01	-0.161
433	ARHGEF3	NM_001128615	chr3	56763339	56763489	-2.24	0.572
434	ARHGEF3	NM_001128615	chr3	56762541	56762692	-4.12	0.996
435	ARHGEF3	NM_001128616	chr3	56762533	56762731	-3.8	0.647
436	ZBTB4	NM_001128833	chr17	7365567	7367059	-2.31	0.466
437	MARK3	NM_001128918	chr14	103852098	103852347	-6.04	1.35
438	MARK3	NM_001128919	chr14	103852095	103852342	-6.3	1.45
439	MARK3	NM_001128920	chr14	103852095	103852343	-6.23	1.43
440	MARK3	NM_001128921	chr14	103852100	103852350	-6.05	1.29
441	ENTPD4	NM_001128930	chr8	23294524	23294724	-3.72	-0.93
442	GSPT1	NM_001130006	chr16	12009274	12009775	-4.06	0.0994
443	EEF1D	NM_001130053	chr8	144671267	144672151	-4.43	1.05
444	SUMF2	NM_001130069	chr7	56132063	56136265	-2.99	1.18
445	PLXNB1	NM_001130082	chr3	48445460	48445710	-3.82	-0.923
446	COL4A3BP	NM_001130105	chr5	74807053	74807656	-3.18	1.42
447	ABHD17A	NM_001130111	chr19	1877072	1877170	-2.37	1.43
448	APOLD1	NM_001130415	chr12	12941706	12941956	-3.04	-1.01
449	APOLD1	NM_001130415	chr12	12878950	12941009	-3.94	-0.0464
450	SSFA2	NM_001130445	chr2	182756740	182757377	-2.37	0.564
451	C17orf96	NM_001130677	chr17	36830640	36831038	-10.5	1.38
452	ELOVL6	NM_001130721	chr4	110972619	110972819	-5.48	-1.49
453	SAP30L	NM_001131062	chr5	153825913	153826360	-2.28	0.868
454	SAP30L	NM_001131063	chr5	153825716	153826365	-3.1	0.975
455	IRX2	NM_001134222	chr5	2748593	2749510	-5.62	0.056
456	RNF24	NM_001134337	chr20	3914372	3914771	-2.94	-0.618
457	SLC6A6	NM_001134368	chr3	14444171	14457929	-3.79	0.935
458	CCNJ	NM_001134375	chr10	97817783	97818382	-2.68	-0.948
459	CCNJ	NM_001134376	chr10	97817758	97818352	-2.73	-0.934
460	ZDHHC4	NM_001134387	chr7	6617307	6618249	-4.46	2.23
461	ZDHHC4	NM_001134388	chr7	6617301	6618293	-4.56	1.84
462	PHLDB2	NM_001134438	chr3	111603758	111632213	-6.44	0.289
463	PHLDB2	NM_001134439	chr3	111603750	111632206	-4.96	0.743
464	C3orf58	NM_001134470	chr3	143704491	143708894	-3.26	0.944
465	LRRC8B	NM_001134476	chr1	90049798	90050198	-4.39	0.877
466	LRRC8D	NM_001134479	chr1	90400244	90400544	-2.58	0.762
467	DERL1	NM_001134671	chr8	124027440	124027640	-2.31	-0.91
468	FERMT2	NM_001134999	chr14	53417175	53417815	-3.19	1.01
469	FERMT2	NM_001135000	chr14	53417176	53417815	-3.36	1.07
470	JDP2	NM_001135049	chr14	75936159	75936809	-3.24	0.371
471	DNAJA3	NM_001135110	chr16	4505726	4505877	-2.48	1.26
472	SMIM13	NM_001135575	chr6	11135675	11135975	-2.2	0.78
473	ZNF577	NM_001135590	chr19	52375344	52375494	-3.73	-2.61
474	CCDC88A	NM_001135597	chr2	55518875	55522846	-3.12	-1.43
475	TGFB2	NM_001135599	chr1	218520163	218520313	-4.08	1.25
476	C11orf68	NM_001135635	chr11	65685352	65686385	-2.26	0.144
477	RAB7L1	NM_001135662	chr1	205738494	205738692	-3.58	0.984
478	ALS2	NM_001135745	chr2	202625675	202626025	-2.42	-0.494
479	CACFD1	NM_001135775	chr9	136333726	136334421	-3.28	-0.197
480	ZBTB43	NM_001135776	chr9	129596038	129596538	-2.84	1.03
481	FAM60A	NM_001135811	chr12	31451117	31479072	-2.7	-0.584
482	RUSC2	NM_001135999	chr9	35546498	35547247	-2.66	0.453
483	R3HCC1	NM_001136108	chr8	23147641	23147940	-3.9	0.306
484	RCC2	NM_001136204	chr1	17735424	17735573	-2.48	-0.754
485	KCTD1	NM_001136205	chr18	24035562	24035711	-2.49	-0.602
486	RCOR3	NM_001136223	chr1	211486998	211487296	-3.6	-1.11
487	RCOR3	NM_001136224	chr1	211487044	211487293	-3.98	-1.26
488	LITAF	NM_001136472	chr16	11643207	11643356	-2.56	-0.674
489	LITAF	NM_001136473	chr16	11643207	11643356	-2.65	-0.678
490	LYSMD1	NM_001136543	chr1	151133217	151133417	-2.63	-1.15
491	LRRFIP1	NM_001137552	chr2	238672510	238672761	-3.36	0.723
492	LRRFIP1	NM_001137553	chr2	238671326	238671526	-3.78	0.851
493	LRRFIP1	NM_001137553	chr2	238672519	238672768	-3.38	0.645
494	ZBTB42	NM_001137601	chr14	105267716	105269059	-9.52	1.08
495	TBL1X	NM_001139466	chrX	9687130	9687330	-3.13	-0.977
496	TBL1X	NM_001139467	chrX	9687135	9687334	-2.74	-0.838
497	TBL1X	NM_001139468	chrX	9687131	9687331	-2.93	-0.963
498	TP53BP1	NM_001141979	chr15	43748139	43748489	-2.17	-0.338
499	TP53BP1	NM_001141979	chr15	43708534	43712673	-3.73	-0.992
500	TP53BP1	NM_001141980	chr15	43708531	43712620	-3.21	-1.02
501	SPG20	NM_001142294	chr13	36909563	36909812	-2.2	-0.9
502	TMEM169	NM_001142311	chr2	216965421	216965720	-2.2	-0.477
503	GNAL	NM_001142339	chr18	11881396	11881745	-5.95	-1.13
504	PRRG1	NM_001142395	chrX	37312504	37312805	-2.65	1.23
505	CTIF	NM_001142397	chr18	46284490	46284739	-2.37	0.736
506	C9orf47	NM_001142413	chr9	91606461	91606768	-5.17	-1.63
507	ZNF780A	NM_001142577	chr19	40579638	40579935	-4.44	-1.05
508	ZNF780A	NM_001142578	chr19	40579547	40580048	-6.52	-1.04
509	ITPK1	NM_001142593	chr14	93407840	93408088	-5.03	0.711
510	ARHGAP32	NM_001142685	chr11	128839386	128839935	-3.92	-1.21
511	KCTD1	NM_001142730	chr18	24035569	24035769	-2.2	-0.745
512	SLC6A8	NM_001142805	chrX	152954149	152955838	-3.36	0.876
513	MXD3	NM_001142935	chr5	176738424	176738799	-4.73	1.77
514	LRRC27	NM_001143757	chr10	134161580	134161780	-2.5	-0.677
515	LRRC27	NM_001143758	chr10	134161581	134161780	-2.51	-0.67
516	COPS2	NM_001143887	chr15	49419796	49420242	-3.45	-0.541
517	DST	NM_001144769	chr6	56420218	56420519	-2.56	-1.25
518	ZNF234	NM_001144824	chr19	44660826	44661126	-2.22	-0.116
519	MIEF2	NM_001144900	chr17	18166436	18168404	-2.51	-0.396
520	GLYCTK	NM_001144951	chr3	52326726	52326972	-2.16	1.22
521	SDK2	NM_001144952	chr17	71333813	71333914	-10.8	-1.46
522	C2orf72	NM_001144994	chr2	231906121	231911992	-3.91	1.35
523	C2orf72	NM_001144994	chr2	231912289	231912539	-5.62	1.37
524	KIAA1671	NM_001145206	chr22	25437218	25437469	-5.01	1.66
525	KIAA1671	NM_001145206	chr22	25436918	25437019	-2.92	1.46
526	KIAA1671	NM_001145206	chr22	25424190	25425440	-9.88	1.01
527	KIAA1671	NM_001145206	chr22	25435320	25435670	-2.69	0.668
528	KIAA1671	NM_001145206	chr22	25435869	25436170	-7.31	1.59
529	KIAA1671	NM_001145206	chr22	25434920	25435221	-4.91	1.37
530	NECAP2	NM_001145277	chr1	16785703	16785802	-4.71	-2.06
531	NECAP2	NM_001145278	chr1	16785606	16785852	-5.18	-1.73
532	CDK6	NM_001145306	chr7	92462555	92462855	-2.17	1.1
533	KDM8	NM_001145348	chr16	27232100	27232842	-2.28	-0.48
534	TTC28	NM_001145418	chr22	28377799	28378850	-2.95	-0.209
535	TTC28	NM_001145418	chr22	28559112	28559463	-2.35	-0.407
536	TTC28	NM_001145418	chr22	28501266	28503175	-9.67	-1.03
537	SNX18	NM_001145427	chr5	53815230	53839430	-8.18	1.1
538	SNX18	NM_001145427	chr5	53813638	53814136	-7.98	1.41
539	EXOG	NM_001145464	chr3	38565549	38565849	-2.89	-0.95
540	ZSCAN18	NM_001145542	chr19	58596445	58596644	-3.01	-0.747
541	TRIM45	NM_001145635	chr1	117663417	117663716	-2.52	-0.768
542	ZNF529	NM_001145649	chr19	37038199	37039146	-6.06	-0.945
543	ZNF529	NM_001145650	chr19	37038192	37039137	-5.89	-0.866
544	WFS1	NM_001145853	chr4	6304294	6304544	-4.14	-1.45
545	SH3BP2	NM_001145855	chr4	2835603	2835754	-3.3	1.02
546	SH3BP2	NM_001145856	chr4	2835606	2835756	-3.78	1.12
547	SLC12A4	NM_001145962	chr16	67977972	67978569	-2.61	-0.7
548	SLC12A4	NM_001145964	chr16	67977974	67978573	-2.16	-0.602
549	MKI67	NM_001145966	chr10	129904532	129904632	-2.63	-0.216
550	SLCO5A1	NM_001146008	chr8	70744031	70744281	-7.6	1.42
551	SLCO5A1	NM_001146008	chr8	70744778	70745376	-434	-0.523
552	SLCO5A1	NM_001146008	chr8	70585015	70585315	-5.51	-1.38
553	SLCO5A1	NM_001146008	chr8	70584667	70584767	-2.47	1.13
554	TJAP1	NM_001146016	chr6	43473507	43473607	-2.92	1.42
555	TJAP1	NM_001146018	chr6	43473500	43473600	-2.46	1.07
556	TJAP1	NM_001146019	chr6	43473502	43473602	-2.56	1.27
557	TJAP1	NM_001146020	chr6	43473502	43473602	-2.56	1.27
558	TOX3	NM_001146188	chr16	52473005	52473205	-4.62	-1.23
559	TOX3	NM_001146188	chr16	52472509	52472808	-5.77	-1.68
560	TOX3	NM_001146188	chr16	52473501	52473750	-2.83	-1.04
561	IVD	NM_001159508	chr15	40710379	40710529	-2.26	1.03
562	ABR	NM_001159746	chr17	908939	909336	-5.32	-0.382
563	RHOBTB2	NM_001160036	chr8	22875823	22876271	-2.26	1.06
564	RHOBTB2	NM_001160037	chr8	22875826	22876273	-2.56	1.12
565	KCNQ5	NM_001160130	chr6	73904650	73905197	-10.1	0.269
566	KCNQ5	NM_001160134	chr6	73904851	73905051	-7.66	1.01
567	DDHD1	NM_001160147	chr14	53619245	53619946	-2.21	0.697
568	ARMC10	NM_001161010	chr7	102715671	102715819	-2.3	1.11
569	PROB1	NM_001161546	chr5	138730490	138730836	-3.02	-1.12
570	SAMD4A	NM_001161576	chr14	55256499	55256948	-2.8	1.61
571	SAMD4A	NM_001161576	chr14	55034379	55034828	-2.64	0.38
572	SAMD4A	NM_001161577	chr14	55256502	55256950	-2.82	1.56
573	PPP2R5C	NM_001161725	chr14	102391787	102391938	-2.37	-0.935
574	TSC1	NM_001162426	chr9	135766883	135767233	-2.58	-0.769
575	TSC1	NM_001162427	chr9	135766883	135767233	-2.58	-0.769
576	MARK2	NM_001163297	chr11	63676545	63676845	-2.19	-0.692
577	ZNF746	NM_001163474	chr7	149191588	149194698	-3.03	1.58
578	SYNRG	NM_001163544	chr17	35877944	35879093	-3.64	-0.394
579	SYNRG	NM_001163545	chr17	35877942	35879091	-3.6	-0.342
580	SYNRG	NM_001163546	chr17	35878035	35879081	-3.45	-0.345
581	SYNRG	NM_001163547	chr17	35878029	35879073	-4.09	-0.362
582	GTF2I	NM_001163636	chr7	74072089	74072337	-2.14	0.337
583	WDR81	NM_001163809	chr17	1628472	1628822	-4.39	0.693
584	WDR81	NM_001163809	chr17	1631259	1631858	-4.4	0.434
585	WDR81	NM_001163809	chr17	1630065	1630564	-6.59	1.06
586	C10orf2	NM_001163812	chr10	102747391	102747887	-3.1	0.491
587	VCAN	NM_001164097	chr5	82832870	82833468	-3.72	-0.652
588	VCAN	NM_001164097	chr5	82835855	82836105	-2.58	-0.537
589	VCAN	NM_001164097	chr5	82836502	82836702	-2.55	-0.818
590	CHAMP1	NM_001164144	chr13	115089329	115090025	-4.26	0.722
591	TRAF3IP2	NM_001164281	chr6	111912549	111913098	-9.78	1.59
592	ZBTB20	NM_001164347	chr3	114070146	114070297	-3.53	1.64
593	ANKRD33B	NM_001164440	chr5	10652587	10653387	-2.28	0.877
594	ASPH	NM_001164755	chr8	62626898	62627049	-2.23	0.683
595	ASPH	NM_001164756	chr8	62626899	62627049	-2.28	0.739
596	SLC7A2	NM_001164771	chr8	17422601	17422850	-2.87	0.645
597	ZNF268	NM_001165881	chr12	133780607	133781355	-6.41	-0.826
598	ZNF268	NM_001165882	chr12	133780603	133781352	-6.66	-0.796
599	ZNF268	NM_001165883	chr12	133781005	133781305	-4.71	-1.25
600	ZNF268	NM_001165884	chr12	133781006	133781306	-4.66	-1.26
601	ZNF268	NM_001165885	chr12	133780658	133781357	-7.26	-0.992
602	ZNF268	NM_001165886	chr12	133780610	133781357	-6.51	-0.866
603	ZNF268	NM_001165887	chr12	133781015	133781314	-4.92	-1.33
604	PDE4D	NM_001165899	chr5	58270542	58270792	-12.4	-2.66
605	DAG1	NM_001165928	chr3	49568611	49568812	-2.18	0.752
606	ZSCAN30	NM_001166012	chr18	32833768	32834218	-2.64	-0.507
607	AP1B1	NM_001166019	chr22	29759069	29784472	-2.92	1.2
608	ERCC1	NM_001166049	chr19	45912714	45912912	-4.81	2.15
609	EME1	NM_001166131	chr17	48458574	48458722	-2.92	-2.03
610	CLCF1	NM_001166212	chr11	67132616	67134935	-3.68	-0.432
611	SPATA13	NM_001166271	chr13	24797336	24823725	-2.63	0.422
612	RGMA	NM_001166283	chr15	93588284	93588735	-5.31	-0.377
613	RGMA	NM_001166286	chr15	93588658	93588758	-2.17	-0.605
614	RGMA	NM_001166286	chr15	93588263	93588560	-3.16	-0.292
615	RGMA	NM_001166287	chr15	93588271	93588718	-5.87	-0.442
616	RGMA	NM_001166288	chr15	93588262	93588559	-3.11	-0.272
617	RGMA	NM_001166288	chr15	93588657	93588756	-2.2	-0.596
618	RGMA	NM_001166289	chr15	93588273	93588720	-5.48	-0.428
619	SLC16A1	NM_001166496	chr1	113459868	113460317	-2.73	0.609
620	IDS	NM_001166550	chrX	148564405	148568461	-2.18	-0.546
621	CTSA	NM_001167594	chr20	44520219	44520370	-4.5	1.39
622	NAV1	NM_001167738	chr1	201751722	201751973	-3.29	-1.05
623	BLCAP	NM_001167820	chr20	36145867	36146211	-2.15	0.751
624	BLCAP	NM_001167823	chr20	36145867	36146211	-2.15	0.751
625	ABL2	NM_001168236	chr1	179076686	179077285	-2.35	-0.417
626	ABL2	NM_001168237	chr1	179076688	179077487	-2.27	-0.326
627	ABL2	NM_001168238	chr1	179076679	179077278	-2.36	-0.431
628	ABL2	NM_001168239	chr1	179076688	179077486	-2.27	-0.352
629	KLHL13	NM_001168299	chrX	117043686	117043834	-2.75	0.877
630	KLHL13	NM_001168300	chrX	117043588	117043934	-4.61	0.992
631	KLHL13	NM_001168301	chrX	117043683	117043832	-2.77	0.822
632	KLHL13	NM_001168302	chrX	117043564	117043914	-3.32	0.909
633	KLHL13	NM_001168303	chrX	117043549	117043947	-3.44	0.885
634	RREB1	NM_001168344	chr6	7230520	7231369	-8.66	1.55
635	SCO2	NM_001169109	chr22	50962139	50962617	-14.1	0.909
636	SCO2	NM_001169110	chr22	50962044	50964431	-6.53	0.919
637	SCO2	NM_001169111	chr22	50962045	50962822	-7.06	0.938
638	STIM2	NM_001169118	chr4	27024712	27025261	-2.33	0.95
639	ATAD3A	NM_001170535	chr1	1447620	1451453	-5.41	1.26
640	LCOR	NM_001170765	chr10	98714880	98715728	-4.14	-0.229
641	LCOR	NM_001170766	chr10	98714882	98715582	-4.07	-0.414
642	BACH2	NM_001170794	chr6	90641970	90642468	-5.26	-0.733
643	ZNF736	NM_001170905	chr7	63809263	63809514	-2.97	0.873
644	ZNF736	NM_001170905	chr7	63808563	63809164	-4.12	0.797
645	PTPRD	NM_001171025	chr9	8518062	8518413	-3.23	-0.547
646	VEGFA	NM_001171622	chr6	43738292	43739038	-7.44	0.928
647	VEGFA	NM_001171623	chr6	43738291	43739034	-7.69	0.945
648	VEGFA	NM_001171624	chr6	43738291	43739034	-7.65	0.945
649	VEGFA	NM_001171625	chr6	43738294	43739043	-7.96	0.958
650	VEGFA	NM_001171626	chr6	43738294	43739042	-8.04	0.954
651	VEGFA	NM_001171627	chr6	43738290	43739031	-7.46	0.939
652	VEGFA	NM_001171628	chr6	43738340	43739032	-10.5	0.997
653	VEGFA	NM_001171629	chr6	43738292	43739037	-7.65	0.925
654	VEGFA	NM_001171630	chr6	43738292	43739038	-7.44	0.928
655	ZEB2	NM_001171653	chr2	145146925	145147324	-2.84	-0.644
656	ZEB2	NM_001171653	chr2	145156959	145157160	-2.28	-0.764
657	CXorf40A	NM_001171909	chrX	149101919	149102020	-2.75	1.35
658	SATB2	NM_001172509	chr2	200136364	200136814	-2.61	0.457
659	NEO1	NM_001172624	chr15	73595062	73595262	-4.91	-1.24
660	CELF1	NM_001172640	chr11	47493566	47493754	-3.05	-1.35
661	ZNF177	NM_001172651	chr19	9491695	9491995	-3.33	-1.46
662	ZNF607	NM_001172677	chr19	38188006	38188255	-2.46	-0.757
663	ZNF607	NM_001172677	chr19	38187560	38187908	-2.21	-0.233
664	ZNF641	NM_001172681	chr12	48736671	48737268	-3.25	-0.446
665	ZNF641	NM_001172682	chr12	48736674	48737272	-4.03	-0.578
666	ZNF573	NM_001172689	chr19	38230550	38230951	-3.45	-0.625
667	ZNF573	NM_001172689	chr19	38229751	38230252	-3.52	0.094
668	ZNF573	NM_001172690	chr19	38230575	38230674	-2.83	-1.65
669	ZNF573	NM_001172690	chr19	38229889	38230135	-3.61	-1.56
670	ZNF573	NM_001172691	chr19	38229838	38230132	-3.87	-1.37
671	ZNF573	NM_001172691	chr19	38230425	38230915	-4.14	-0.552
672	ZNF573	NM_001172692	chr19	38230535	38230980	-4.17	-0.788
673	ZNF573	NM_001172692	chr19	38229745	38230240	-3.94	-0.745
674	PPARGC1B	NM_001172698	chr5	149213057	149213207	-5.13	0.257
675	PPARGC1B	NM_001172699	chr5	149213080	149213181	-2.61	-1.21
676	SHROOM1	NM_001172700	chr5	132160949	132161397	-2.75	-1.19
677	SHROOM1	NM_001172700	chr5	132161545	132161744	-4.3	1.07
678	GGA3	NM_001172703	chr17	73232785	73233183	-4.9	-0.979
679	GGA3	NM_001172704	chr17	73232785	73233183	-4.9	-0.979
680	GOLGA4	NM_001172713	chr3	37284930	37285031	-3.41	1.48
681	DPY19L3	NM_001172774	chr19	32975310	32975510	-2.19	-0.753
682	ZNF555	NM_001172775	chr19	2853327	2853877	-2.65	-0.635
683	ZNF555	NM_001172775	chr19	2859372	2859623	-2.47	-0.89
684	YTHDF2	NM_001172828	chr1	29069812	29070357	-2.19	0.516
685	ARHGAP5	NM_001173	chr14	32560654	32560904	-2.3	1.09
686	OBSL1	NM_001173408	chr2	220435081	220435774	-4.17	0.269
687	OBSL1	NM_001173431	chr2	220434969	220435869	-2.18	0.186
688	OBSL1	NM_001173431	chr2	220420870	220421281	-4.44	-1.2
689	ARHGEF9	NM_001173480	chrX	62974484	62974932	-2.27	0.56
690	PRRG1	NM_001173490	chrX	37312532	37312781	-2.53	1.26
691	PCDH7	NM_001173523	chr4	30724430	30725129	-3.78	1.09
692	PCDH7	NM_001173523	chr4	30725228	30725927	-2.19	0.455
693	CHST11	NM_001173982	chr12	105151229	105151627	-3.53	0.384
694	POLL	NM_001174084	chr10	103338987	103339287	-2.67	0.971
695	ZEB1	NM_001174094	chr10	31815907	31816207	-2.66	-0.58
696	PRR7	NM_001174101	chr5	176882987	176883138	-3.66	1.48
697	PRR7	NM_001174102	chr5	176882995	176883141	-3.47	1.53
698	MEX3D	NM_001174118	chr19	1555061	1567909	-2.89	0.653
699	ZFYVE27	NM_001174119	chr10	99519324	99519573	-2.84	1.39
700	ZFYVE27	NM_001174120	chr10	99519231	99519578	-3.62	1.49
701	ZFYVE27	NM_001174121	chr10	99519229	99519576	-4.11	1.56
702	ZFYVE27	NM_001174122	chr10	99519230	99519577	-4	1.54
703	CPEB2	NM_001177381	chr4	15004647	15005347	-7.29	1.19
704	CPEB2	NM_001177382	chr4	15004646	15005345	-7.08	1.13
705	CPEB2	NM_001177383	chr4	15004646	15005346	-6.85	1.08
706	CPEB2	NM_001177384	chr4	15004646	15005344	-6.64	1.1
707	MAMLD1	NM_001177466	chrX	149638206	149638356	-2.7	0.838
708	DAG1	NM_001177634	chr3	49568617	49568817	-2.25	0.787
709	DAG1	NM_001177640	chr3	49568615	49568815	-2.4	0.81
710	DAG1	NM_001177641	chr3	49548049	49568375	-2.2	0.531
711	FREM1	NM_001177704	chr9	14775892	14776141	-6.04	-0.704
712	KLF11	NM_001177716	chr2	10187945	10188593	-3.78	0.913
713	KLF11	NM_001177718	chr2	10187946	10188594	-3.45	0.856
714	SYT12	NM_001177880	chr11	66816459	66817002	-6.27	0.146
715	SCN8A	NM_001177984	chr12	52200557	52200807	-9.88	-2.28
716	SCN8A	NM_001177984	chr12	52201056	52201556	-15	-1.61
717	SCN8A	NM_001177984	chr12	52201805	52202005	-6.78	-1.02
718	PARP8	NM_001178055	chr5	50090833	50091132	-2.4	-0.377
719	PARP8	NM_001178056	chr5	50090857	50091106	-2.26	-0.397
720	SEMA6C	NM_001178061	chr1	151105204	151105652	-2.66	0.00395
721	SEMA6C	NM_001178062	chr1	151105298	151105644	-3.3	-0.624
722	EXT2	NM_001178083	chr11	44265841	44266336	-4.11	-0.714
723	EXT2	NM_001178083	chr11	44129571	44129770	-6.83	-1.46
724	ZFX	NM_001178084	chrX	24228575	24229525	-3.18	0.757
725	ZFX	NM_001178085	chrX	24228579	24229529	-3.15	0.816
726	ZFX	NM_001178086	chrX	24228564	24229359	-2.64	0.831
727	ZFX	NM_001178095	chrX	24228584	24229483	-2.8	0.798
728	EGF	NM_001178130	chr4	110932541	110932692	-3.12	-1.06
729	EGF	NM_001178131	chr4	110932542	110932692	-3.05	-1.04
730	CPXM1	NM_001184699	chr20	2774763	2775216	-3.12	-1.3
731	TIPARP	NM_001184717	chr3	156395475	156411823	-2.61	0.563
732	TIPARP	NM_001184717	chr3	156422473	156422821	-4.24	1.02
733	TIPARP	NM_001184718	chr3	156421485	156422816	-4.56	1.08
734	TIPARP	NM_001184718	chr3	156395514	156411815	-2.53	0.586
735	ASTN2	NM_001184734	chr9	119187552	119187699	-3.19	2.12
736	ARMCX6	NM_001184768	chrX	100871248	100871596	-4.1	1.07
737	GPRASP2	NM_001184876	chrX	101969613	101969764	-2.77	-1.2
738	CARD8	NM_001184901	chr19	48714428	48714927	-2.16	-0.172
739	CARD8	NM_001184902	chr19	48714415	48715109	-3.24	-0.171
740	CARD8	NM_001184903	chr19	48714433	48714933	-2.16	-0.128
741	WNK1	NM_001184985	chr12	862138	922903	-12.1	1.07
742	NCAPH2	NM_001185011	chr22	50962059	50962709	-10.4	0.871
743	NCAPH2	NM_001185011	chr22	50946744	50946845	-3.21	1.33
744	NCOR1	NM_001190440	chr17	15935404	15935704	-4.45	-0.817
745	NCOR1	NM_001190440	chr17	15961863	15965122	-3.9	-1.55
746	CLSPN	NM_001190481	chr1	36226002	36226352	-2.66	-0.46
747	NFIB	NM_001190738	chr9	14087910	14088209	-4.72	1.26
748	TRAF1	NM_001190945	chr9	123666846	123667242	-9.4	1.28
749	FAM193B	NM_001190946	chr5	176951216	176952114	-3.69	-0.458
750	TRAF1	NM_001190947	chr9	123666849	123667246	-9.2	1
751	TNPO3	NM_001191028	chr7	128694730	128694880	-2.18	0.448
752	MID1	NM_001193277	chrX	10414292	10414491	-434	-1.05
753	TMEM127	NM_001193304	chr2	96917485	96918429	-2.21	-0.624
754	C9orf3	NM_001193329	chr9	97849200	97849351	-2.73	1.1
755	ADAR	NM_001193495	chr1	154574899	154578528	-3.06	1.05
756	ZNF850	NM_001193552	chr19	37238662	37239112	-3.55	-0.286
757	ZNF850	NM_001193552	chr19	37241252	37241552	-2.69	-0.334
758	ZNF850	NM_001193552	chr19	37239808	37240008	-2.87	-0.993
759	ATF5	NM_001193646	chr19	50436059	50436306	-5.43	-1.54
760	MEPCE	NM_001194990	chr7	100028285	100028935	-5.38	0.872
761	CEP152	NM_001194998	chr15	49031181	49031332	-2.61	-1.29
762	MR1	NM_001194999	chr1	181024595	181024994	-12.8	0.574
763	MR1	NM_001195000	chr1	181024588	181024988	-13	0.574
764	MR1	NM_001195035	chr1	181024592	181024992	-13.2	0.587
765	PLEKHO2	NM_001195059	chr15	65157275	65158019	-4.07	1.09
766	ZNF783	NM_001195220	chr7	148978719	148979116	-2.18	0.463
767	ZNF783	NM_001195220	chr7	148979214	148979512	-3.49	0.72
768	DICER1	NM_001195573	chr14	95569788	95570038	-2.31	-0.613
769	SEPHS1	NM_001195602	chr10	13359487	13359687	-3.45	-0.836
770	SEPHS1	NM_001195604	chr10	13359537	13359638	-2.83	-0.899
771	CHPF	NM_001195731	chr2	220406499	220406698	-2.25	0.656
772	CHPF	NM_001195731	chr2	220404016	220404265	-2.67	0.294
773	BID	NM_001196	chr22	18226719	18257163	-3.07	1.26
774	KMT2A	NM_001197104	chr11	118395139	118395240	-3.11	-1.79
775	IQCJ-SCHIP1	NM_001197114	chr3	159482287	159482884	-3.15	0.711
776	PPP1R12B	NM_001197131	chr1	202555347	202555548	-3.73	1.98
777	PDE4D	NM_001197218	chr5	58270540	58270740	-11.6	-2.07
778	PDE4D	NM_001197219	chr5	58270510	58270711	-12.6	-2.13
779	PDE4D	NM_001197220	chr5	58270602	58270703	-7.67	-2.9
780	PDE4D	NM_001197222	chr5	58270605	58270706	-7.74	-2.93
781	BTN3A2	NM_001197246	chr6	26377005	26377255	-2.19	0.817
782	BTN3A2	NM_001197247	chr6	26378101	26378251	-2.7	0.882
783	BTN3A2	NM_001197249	chr6	26378099	26378200	-2.17	0.782
784	HSPA12B	NM_001197327	chr20	3732210	3732311	-2.76	2.36
785	HSPA12B	NM_001197327	chr20	3732759	3733109	-2.35	0.0859
786	STON1	NM_001198595	chr2	48808906	48809305	-2.37	-0.532
787	RUNX1T1	NM_001198625	chr8	92972472	92972623	-10.1	3.42
788	RUNX1T1	NM_001198627	chr8	92972484	92972685	-3.17	3.25
789	RUNX1T1	NM_001198628	chr8	92972482	92972632	-11.6	4.1
790	RUNX1T1	NM_001198679	chr8	92972461	92972661	-12	3.38
791	PI4KB	NM_001198775	chr1	151264971	151265122	-2.51	1.02
792	POU2F1	NM_001198783	chr1	167384892	167385043	-2.41	-0.848
793	POU2F1	NM_001198786	chr1	167384911	167385111	-2.22	-0.596
794	ARPC4-TTLL3	NM_001198793	chr3	9876544	9876894	-8.36	-1.32
795	ARPC4-TTLL3	NM_001198793	chr3	9877341	9877741	-7.11	-1.59
796	EIF4G3	NM_001198801	chr1	21268256	21268406	-2.46	0.159
797	SLC43A1	NM_001198810	chr11	57252397	57252545	-2.83	0.928
798	C8orf58	NM_001198827	chr8	22461270	22461467	-3.57	-0.611
799	PDE4DIP	NM_001198834	chr1	144851971	144852072	-3.06	1.82
800	RBM14	NM_001198837	chr11	66384152	66384352	-2.17	0.626
801	RBM12	NM_001198838	chr20	34241318	34252779	-2.21	-0.469
802	RBM12	NM_001198840	chr20	34241323	34252779	-2.26	-0.468
803	RBM14-RBM4	NM_001198845	chr11	66384150	66384346	-2.31	0.628
804	FOXJ3	NM_001198850	chr1	42645136	42645385	-3.59	1.01
805	FOXJ3	NM_001198851	chr1	42645132	42645381	-3.36	0.986
806	FOXJ3	NM_001198852	chr1	42645137	42645386	-3.25	0.941
807	PTCD1	NM_001198879	chr7	99016805	99017704	-2.45	0.566
808	BAIAP3	NM_001199096	chr16	1399242	1399442	-2.16	0.18
809	BAIAP3	NM_001199097	chr16	1399242	1399442	-2.16	0.18
810	BAIAP3	NM_001199098	chr16	1399243	1399442	-2.17	0.156
811	AMMECR1L	NM_001199140	chr2	128631440	128631689	-2.82	-0.726
812	DGKZ	NM_001199266	chr11	46401806	46402005	-2.27	1.68
813	HAS3	NM_001199280	chr16	69143722	69143922	-3.36	1.68
814	NCOA7	NM_001199619	chr6	126210296	126211045	-5.58	0.816
815	NCOA7	NM_001199620	chr6	126210270	126211016	-6.24	0.917
816	NCOA7	NM_001199621	chr6	126210276	126211021	-6	0.895
817	PPP2R5A	NM_001199756	chr1	212502534	212506847	-2.42	1.02
818	CENPO	NM_001199803	chr2	25043069	25043317	-2.54	-0.757
819	CENPO	NM_001199803	chr2	25043563	25043762	-3.73	-1.05
820	SERF2	NM_001199875	chr15	44084570	44085803	-3.35	-0.05
821	SERF2	NM_001199876	chr15	44084569	44085912	-3.05	0.000213
822	OPRL1	NM_001200019	chr20	62731500	62731649	-4.23	2.84
823	OPRL1	NM_001200019	chr20	62730113	62731154	-5.1	0.72
824	PPP1R3B	NM_001201329	chr8	8998232	8998829	-5.45	1.08
825	HMGN3	NM_001201362	chr6	79911206	79911354	-2.72	1.18
826	HMGN3	NM_001201363	chr6	79911202	79911348	-3.71	1.17
827	ZNF513	NM_001201459	chr2	27600889	27601188	-4.12	-1.16
828	RBM15	NM_001201545	chr1	110882737	110883134	-2.27	0.67
829	RBM15	NM_001201545	chr1	110883480	110883976	-3.06	0.738
830	ZNF821	NM_001201552	chr16	71893632	71894333	-2.68	-0.614
831	ZNF821	NM_001201553	chr16	71893632	71894327	-2.77	-0.614
832	ZNF821	NM_001201554	chr16	71893631	71894322	-2.47	-0.521
833	ZNF821	NM_001201556	chr16	71893632	71894326	-2.91	-0.614
834	NR4A1	NM_001202233	chr12	52448181	52448779	-6.78	0.778
835	ZNF177	NM_001202425	chr19	9491747	9491997	-3.46	-1.35
836	CTDP1	NM_001202504	chr18	77474580	77475376	-3.53	0.703
837	CKLF-CMTM1	NM_001202509	chr16	66586514	66586661	-2.26	1
838	CUX1	NM_001202543	chr7	101891735	101892683	-5.46	1.08
839	CUX1	NM_001202543	chr7	101844911	101845261	-4.67	0.867
840	BMPR2	NM_001204	chr2	203420083	203420383	-3.36	1.05
841	CKLF-CMTM1	NM_001204098	chr16	66586513	66586656	-2.82	0.987
842	TP73	NM_001204184	chr1	3649915	3650366	-6.39	1.69
843	TP73	NM_001204185	chr1	3649918	3650368	-6.2	1.72
844	TP73	NM_001204186	chr1	3650037	3650236	-5.78	1.62
845	TP73	NM_001204187	chr1	3649915	3650365	-6.41	1.68
846	TP73	NM_001204188	chr1	3649941	3650338	-6	1.59
847	TP73	NM_001204189	chr1	3649922	3650372	-6.27	1.79
848	TP73	NM_001204190	chr1	3649928	3650377	-6.16	1.79
849	TP73	NM_001204191	chr1	3649925	3650374	-5.92	1.62
850	TP73	NM_001204192	chr1	3649941	3650339	-6.01	1.59
851	SRP19	NM_001204193	chr5	112203260	112203456	-2.27	0.769
852	NR3C1	NM_001204258	chr5	142779399	142779849	-4.8	1.52
853	NR3C1	NM_001204259	chr5	142779399	142779849	-4.8	1.52
854	NR3C1	NM_001204260	chr5	142779399	142779849	-4.8	1.52
855	NR3C1	NM_001204261	chr5	142779399	142779849	-4.8	1.52
856	NR3C1	NM_001204262	chr5	142779399	142779849	-4.8	1.52
857	NR3C1	NM_001204263	chr5	142779399	142779849	-4.8	1.52
858	NR3C1	NM_001204264	chr5	142779399	142779849	-4.8	1.52
859	ZNF664	NM_001204298	chr12	124496558	124496758	-3.76	0.712
860	FAM101A	NM_001204299	chr12	124799921	124800271	-4.04	-0.833
861	LIMK1	NM_001204426	chr7	73535571	73535818	-3.26	-0.87
862	TNFRSF19	NM_001204459	chr13	24144607	24144857	-2.19	1.17
863	TVP23C-CDRT4	NM_001204478	chr17	15341352	15341451	-2.76	-1.25
864	RAB43	NM_001204883	chr3	128840281	128840993	-2.22	1.59
865	RAB43	NM_001204884	chr3	128840269	128840857	-2.73	1.85
866	RAB43	NM_001204885	chr3	128840258	128840765	-3.18	2.4
867	RAB43	NM_001204886	chr3	128840246	128840597	-4.09	2.49
868	RAB43	NM_001204887	chr3	128840248	128840597	-2.95	0.932
869	RAB43	NM_001204888	chr3	128840249	128840597	-2.93	0.932
870	SLC19A1	NM_001205207	chr21	46935507	46935955	-3.45	0.797
871	NXN	NM_001205319	chr17	703991	704240	-8.79	-1.13
872	NXN	NM_001205319	chr17	703693	703843	-12	-1.7
873	KLF9	NM_001206	chr9	73028035	73028184	-10.9	1.64
874	MAVS	NM_001206491	chr20	3846523	3847124	-2.64	0.941
875	POLR1D	NM_001206559	chr13	28195075	28195273	-4.23	1.65
876	NCOR2	NM_001206654	chr12	124809255	124809655	-2.6	-0.495
877	CTNND1	NM_001206883	chr11	57569378	57569578	-5.25	-1.2
878	CTNND1	NM_001206884	chr11	57569419	57569569	-4.77	-0.943
879	CTNND1	NM_001206885	chr11	57569416	57569567	-5.38	-1.04
880	CTNND1	NM_001206886	chr11	57569373	57569574	-4.63	-1.16
881	CTNND1	NM_001206887	chr11	57569420	57569620	-3.23	-0.856
882	CTNND1	NM_001206888	chr11	57569376	57569577	-4.21	-1.13
883	CTNND1	NM_001206889	chr11	57569399	57569599	-5.11	-1.03
884	CTNND1	NM_001206890	chr11	57569383	57569583	-4.96	-1.11
885	CTNND1	NM_001206891	chr11	57569382	57569583	-5.43	-1.15
886	CACNB3	NM_001206915	chr12	49221432	49221831	-2.54	-0.66
887	CACNB3	NM_001206916	chr12	49221495	49221742	-2.37	-0.613
888	CACNB3	NM_001206917	chr12	49221437	49221835	-3.09	-0.781
889	MLLT4	NM_001207008	chr6	168352091	168366520	-5.29	-0.346
890	ZNF497	NM_001207009	chr19	58868147	58874066	-2.7	0.00473
891	RNF40	NM_001207033	chr16	30786931	30787429	-2.27	0.866
892	RNF40	NM_001207034	chr16	30786931	30787429	-2.27	0.866
893	CDKN1A	NM_001220778	chr6	36652136	36652236	-2.85	-0.881
894	CCNT2	NM_001241	chr2	135711087	135711686	-2.31	-0.437
895	EDA2R	NM_001242310	chrX	65817469	65817818	-2.77	0.607
896	MAP3K13	NM_001242314	chr3	185191023	185191274	-4.14	-1.62
897	MAP3K13	NM_001242317	chr3	185191063	185191264	-3.3	-1.58
898	PDE7A	NM_001242318	chr8	66630905	66631006	-2.15	-0.97
899	SLC46A1	NM_001242366	chr17	26725731	26726030	-4.03	1.31
900	CACFD1	NM_001242369	chr9	136333724	136334420	-3.21	-0.171
901	CACFD1	NM_001242370	chr9	136333745	136334434	-2.62	0.0587
902	AHRR	NM_001242412	chr5	433989	434933	-6.95	1.53
903	GFOD1	NM_001242628	chr6	13364776	13365472	-15.2	0.814
904	GFOD1	NM_001242629	chr6	13487032	13487574	-9.45	1.17
905	GFOD1	NM_001242630	chr6	13364779	13365128	-6.15	0.411
906	GFOD1	NM_001242630	chr6	13365226	13365426	-7.95	1.58
907	C1orf233	NM_001242659	chr1	1533486	1533736	-6.48	1.12
908	IKBKB	NM_001242778	chr8	42188526	42189125	-2.62	-0.439
909	ANKRD6	NM_001242809	chr6	90340429	90340826	-3.07	-0.735
910	ANKRD6	NM_001242811	chr6	90340459	90340859	-3.24	-0.673
911	ANKRD6	NM_001242813	chr6	90340453	90340854	-3.16	-0.71
912	ANKRD6	NM_001242814	chr6	90340427	90340825	-2.85	-0.714
913	SLAIN1	NM_001242868	chr13	78272529	78293670	-5.07	1.34
914	SLAIN1	NM_001242868	chr13	78272037	78272432	-2.61	0.62
915	PRKCZ	NM_001242874	chr1	2116071	2116492	-3.89	-1.95
916	ZKSCAN3	NM_001242895	chr6	28333684	28334131	-2.17	-0.574
917	E2F3	NM_001243076	chr6	20490464	20491410	-2.63	0.57
918	FOXM1	NM_001243088	chr12	2967593	2968391	-3.03	-0.612
919	FOXM1	NM_001243089	chr12	2967592	2968389	-3.14	-0.599
920	PDE4A	NM_001243121	chr19	10577613	10578362	-2.88	0.646
921	DENND5A	NM_001243254	chr11	9225565	9225665	-5.14	-1.19
922	ALCAM	NM_001243280	chr3	105085804	105086253	-8.43	1.96
923	PVRL3	NM_001243286	chr3	110852672	110853022	-9.46	-0.97
924	STARD13	NM_001243466	chr13	33703219	33703762	-3.06	0.543
925	STARD13	NM_001243474	chr13	33703248	33703791	-2.86	0.785
926	STARD13	NM_001243476	chr13	33703244	33703793	-3.08	0.856
927	TEX264	NM_001243725	chr3	51738095	51738290	-2.83	0.757
928	C7orf49	NM_001243749	chr7	134851020	134851412	-3.93	0.871
929	C7orf49	NM_001243751	chr7	134851017	134851408	-3.9	0.858
930	C7orf49	NM_001243753	chr7	134851025	134851422	-3.51	0.832
931	FAM213A	NM_001243778	chr10	82192003	82192204	-2.78	0.821
932	CHST12	NM_001243794	chr7	2473236	2473629	-4.47	0.867
933	CHST12	NM_001243795	chr7	2473279	2473625	-3.16	0.76
934	TRRAP	NM_001244580	chr7	98609867	98610167	-3.98	0.609
935	FOXP1	NM_001244810	chr3	71008358	71008459	-3.05	-1.81
936	FOXP1	NM_001244815	chr3	71008301	71008452	-3.18	-1.69
937	FOXP1	NM_001244816	chr3	71008362	71008463	-4.03	-2.62
938	NAV2	NM_001244963	chr11	20139905	20140354	-3.1	-0.534
939	NRP1	NM_001244973	chr10	33468851	33469100	-11.6	-1.34
940	CLIP1	NM_001247997	chr12	122862200	122862499	-2.28	-0.802
941	RAP1B	NM_001251917	chr12	69004766	69042512	-2.33	0.809
942	RAP1B	NM_001251918	chr12	69004765	69042520	-2.22	0.786
943	RAP1B	NM_001251922	chr12	69004764	69042518	-2.36	0.793
944	ARHGEF26	NM_001251963	chr3	153839868	153840415	-2.73	0.735
945	FAM69A	NM_001252271	chr1	93308814	93309314	-14.8	2.56
946	ZBTB7B	NM_001252406	chr1	154987320	154988165	-4.22	0.53
947	RHNO1	NM_001252500	chr12	2997467	2997615	-2.59	-0.907
948	C14orf132	NM_001252507	chr14	96558267	96558566	-2.89	-0.872
949	ZNF638	NM_001252612	chr2	71576940	71577141	-2.6	-0.949
950	ZNF331	NM_001253798	chr19	54080274	54080824	-2.17	0.0727
951	ZNF331	NM_001253799	chr19	54080446	54080844	-3.51	-0.39
952	ZNF331	NM_001253800	chr19	54080290	54080838	-3.06	-0.0923
953	ZNF331	NM_001253801	chr19	54080280	54080830	-2.41	0.0553
954	PTPDC1	NM_001253830	chr9	96793190	96793390	-3.16	1.33
955	TBC1D1	NM_001253912	chr4	37903806	37904106	-6.08	1.42
956	CCDC88A	NM_001254943	chr2	55518884	55522856	-3.12	-1.44
957	RNF213	NM_001256071	chr17	78313206	78313556	-2.18	0.814
958	RNF213	NM_001256071	chr17	78237380	78237481	-2.54	1.59
959	RNF213	NM_001256071	chr17	78368489	78368689	-3.03	-1.53
960	WNT5A	NM_001256105	chr3	55504027	55508612	-9.87	-0.695
961	TDRP	NM_001256113	chr8	442550	494746	-3.48	-0.902
962	NAA10	NM_001256120	chrX	153199898	153200407	-2.57	0.589
963	TRIM65	NM_001256124	chr17	73886478	73887272	-7.53	0.885
964	TRIM65	NM_001256124	chr17	73888865	73892985	-3.45	0.435
965	ARMCX4	NM_001256155	chrX	100743673	100743923	-4.32	-0.595
966	ANKRD11	NM_001256182	chr16	89346146	89347045	-5.13	0.76
967	ANKRD11	NM_001256182	chr16	89347842	89347993	-2.36	1.01
968	ANKRD11	NM_001256183	chr16	89347832	89347983	-2.44	1.01
969	ANKRD11	NM_001256183	chr16	89346140	89346838	-5.44	0.813
970	GLS	NM_001256310	chr2	191745596	191746195	-2.59	0.819
971	MCMBP	NM_001256378	chr10	121632095	121632245	-2.17	0.956
972	ELOVL1	NM_001256399	chr1	43829362	43829511	-2.81	1.07
973	ELOVL1	NM_001256401	chr1	43829357	43829503	-3.18	1.22
974	CABLES1	NM_001256438	chr18	20837358	20837706	-2.3	0.84
975	PRRT2	NM_001256443	chr16	29824440	29824737	-5.18	-0.732
976	ZBTB7B	NM_001256455	chr1	154987313	154987762	-3.13	0.602
977	CPSF3L	NM_001256456	chr1	1254713	1255843	-2.5	-1.05
978	CPSF3L	NM_001256460	chr1	1254748	1254847	-3.77	-1.02
979	CPSF3L	NM_001256462	chr1	1249264	1249742	-2.85	0.824
980	GOLGB1	NM_001256486	chr3	121383143	121383343	-3.96	-1.06
981	GOLGB1	NM_001256487	chr3	121383144	121383345	-4.12	-1.09
982	GOLGB1	NM_001256487	chr3	121416486	121416637	-2.71	1.45
983	GOLGB1	NM_001256488	chr3	121383142	121383342	-4.5	-1.18
984	GOLGB1	NM_001256488	chr3	121416469	121416620	-2.7	1.39
985	BRSK2	NM_001256627	chr11	1483720	1483869	-3.3	-1.54
986	BRSK2	NM_001256629	chr11	1483719	1483869	-3.06	-1.54
987	BRSK2	NM_001256630	chr11	1483719	1483869	-3.13	-1.54
988	ZNF43	NM_001256648	chr19	21990237	21990487	-3.38	-0.798
989	ZNF43	NM_001256648	chr19	21992227	21992526	-2.78	-0.462
990	ZNF43	NM_001256649	chr19	21992238	21992488	-2.31	-0.197
991	ZNF43	NM_001256651	chr19	21992274	21992474	-2.58	-0.39
992	ZNF43	NM_001256654	chr19	21992233	21992483	-2.3	-0.209
993	USP3	NM_001256702	chr15	63883405	63883555	-3.28	-0.977
994	RNF165	NM_001256758	chr18	44039990	44040239	-3.49	0.0317
995	RNF165	NM_001256758	chr18	44036772	44037021	-2.16	0.469
996	PAF1	NM_001256826	chr19	39876614	39877174	-3.06	-0.638
997	ABR	NM_001256847	chr17	908953	909304	-5	-0.41
998	KANK1	NM_001256876	chr9	712307	712507	-7.75	1.45
999	KANK1	NM_001256876	chr9	712905	713354	-11.8	1.35
1000	KANK1	NM_001256876	chr9	710961	711062	-6.23	1.44
1001	KANK1	NM_001256877	chr9	712308	712509	-8.22	1.47
1002	KANK1	NM_001256877	chr9	712906	713355	-11.9	1.37
1003	KANK1	NM_001256877	chr9	710964	711064	-6.43	1.47
1004	RHNO1	NM_001257097	chr12	2997457	2997606	-2.51	-0.839
1005	RHNO1	NM_001257098	chr12	2997459	2997608	-2.99	-0.899
1006	ELK1	NM_001257168	chrX	47500813	47509904	-4.29	1.11
1007	SLC20A2	NM_001257180	chr8	42329902	42330153	-2.43	-0.451
1008	UBE2V1	NM_001257393	chr20	48697958	48698256	-2.59	-0.737
1009	UBE2V1	NM_001257394	chr20	48697959	48698259	-2.75	-0.756
1010	UBE2V1	NM_001257396	chr20	48697957	48698255	-2.68	-0.738
1011	UBE2V1	NM_001257397	chr20	48697959	48698258	-2.65	-0.731
1012	TMEM189-UBE2V1	NM_001257399	chr20	48697957	48698254	-2.78	-0.802
1013	IL4R	NM_001257406	chr16	27375209	27375605	-2.27	-0.87
1014	TRMT2A	NM_001257994	chr22	20104099	20104619	-5.58	1.13
1015	IL4R	NM_001257997	chr16	27375211	27375606	-2.44	-0.929
1016	ANKFY1	NM_001257999	chr17	4070744	4071143	-3.44	1.43
1017	POLR3E	NM_001258033	chr16	22337118	22337565	-2.56	0.691
1018	POLR3E	NM_001258034	chr16	22337128	22337576	-2.74	0.691
1019	POLR3E	NM_001258035	chr16	22337138	22337534	-2.68	0.67
1020	POLR3E	NM_001258036	chr16	22337112	22337557	-2.49	0.703
1021	KCTD1	NM_001258221	chr18	24035556	24035703	-2.63	-0.627
1022	KCTD1	NM_001258222	chr18	24035563	24035712	-2.49	-0.602
1023	NFATC2	NM_001258296	chr20	50007371	50007670	-7.4	0.0449
1024	CLPB	NM_001258392	chr11	72003917	72004117	-2.16	-1.19
1025	CLPB	NM_001258392	chr11	72004215	72004515	-2.82	-0.978
1026	CLPB	NM_001258393	chr11	72003919	72004119	-2.52	-1.26
1027	CLPB	NM_001258393	chr11	72004218	72004519	-3.63	-1.05
1028	CLPB	NM_001258394	chr11	72003916	72004116	-2.19	-1.2
1029	CLPB	NM_001258394	chr11	72004215	72004514	-2.96	-0.974
1030	CDK6	NM_001259	chr7	92462531	92462832	-2.41	1.16
1031	ZNF155	NM_001260486	chr19	44501433	44501583	-2.87	-1.15
1032	ZNF155	NM_001260487	chr19	44501440	44501589	-2.77	-1.11
1033	ZNF155	NM_001260488	chr19	44501439	44501588	-2.63	-1.07
1034	BCAR3	NM_001261408	chr1	94041628	94048296	-3.12	-0.362
1035	BCAR3	NM_001261409	chr1	94041623	94048289	-2.93	-0.274
1036	BCAR3	NM_001261410	chr1	94041628	94048296	-3.14	-0.365
1037	OS9	NM_001261423	chr12	58114697	58114846	-2.6	-0.939
1038	GNAL	NM_001261443	chr18	11881394	11881744	-5.76	-1.09
1039	GNAL	NM_001261444	chr18	11881519	11881718	-2.47	-0.502
1040	PSMG1	NM_001261824	chr21	40553773	40555293	-3.96	0.997
1041	KIF18B	NM_001264573	chr17	43003624	43003774	-2.84	-0.926
1042	ZNF211	NM_001265597	chr19	58153023	58153273	-3.44	-1.03
1043	ZNF211	NM_001265597	chr19	58152276	58152725	-2.25	-0.433
1044	ZNF211	NM_001265598	chr19	58153066	58153267	-2.73	-0.921
1045	ZNF211	NM_001265599	chr19	58153067	58153267	-2.69	-0.918
1046	ZNF211	NM_001265600	chr19	58153014	58153265	-2.85	-0.831
1047	ZNF211	NM_001265600	chr19	58152314	58152715	-2.28	-0.396
1048	MAPKBP1	NM_001265611	chr15	42116734	42117969	-2.6	-0.0446
1049	PSME3	NM_001267045	chr17	40985505	40985806	-3.51	1.08
1050	SNX17	NM_001267060	chr2	27600149	27600400	-2.23	-0.729
1051	PDCD6	NM_001267556	chr5	271833	271932	-3.65	1.51
1052	PDCD6	NM_001267559	chr5	271831	271928	-4.22	1.54
1053	ZNF248	NM_001267597	chr10	38118491	38118642	-2.24	1.06
1054	GPR161	NM_001267612	chr1	168054053	168054601	-2.61	0.107
1055	GPR161	NM_001267614	chr1	168053771	168056858	-6.52	0.407
1056	ZNF850	NM_001267779	chr19	37238664	37239114	-3.37	-0.238
1057	ZNF850	NM_001267779	chr19	37241256	37241556	-3.15	-0.525
1058	ZNF850	NM_001267779	chr19	37239810	37240011	-2.89	-1.01
1059	AMBRA1	NM_001267782	chr11	46418407	46419251	-2.8	-0.692
1060	AMBRA1	NM_001267783	chr11	46418410	46419259	-2.23	-0.67
1061	MED24	NM_001267797	chr17	38175697	38175847	-3.29	-1.27
1062	CDC42EP3	NM_001270436	chr2	37872555	37872855	-2.35	0.953
1063	CDC42EP3	NM_001270437	chr2	37873605	37873805	-2.19	0.695
1064	CDC42EP3	NM_001270437	chr2	37872559	37872859	-2.8	1.02
1065	TST	NM_001270483	chr22	37414527	37414768	-4.68	1.74
1066	TST	NM_001270483	chr22	37407283	37414336	-5.35	-1.94
1067	TNFAIP3	NM_001270507	chr6	138200171	138200469	-4.03	0.501
1068	LATS1	NM_001270519	chr6	150004894	150005241	-3.15	0.548
1069	WTAP	NM_001270531	chr6	160169375	160174564	-3.16	-1.03
1070	DEDD2	NM_001270614	chr19	42703342	42703940	-2.65	-0.86
1071	DEDD2	NM_001270615	chr19	42703430	42703921	-2.97	-0.72
1072	PROX1	NM_001270616	chr1	214170512	214171063	-4.5	1.22
1073	MARCH6	NM_001270660	chr5	10434131	10434331	-4.87	-1.21
1074	SMOX	NM_001270691	chr20	4129524	4155725	-3.44	1.34
1075	BCL2L13	NM_001270729	chr22	18209840	18210537	-3.27	0.402
1076	BCL2L13	NM_001270733	chr22	18209474	18210574	-2.93	0.355
1077	BCL2L13	NM_001270733	chr22	18209474	18210574	-2.93	0.355
1078	BCL2L13	NM_001270734	chr22	18209845	18210542	-3.55	0.425
1079	JAKMIP2	NM_001270934	chr5	146970974	146971175	-3.24	-0.833
1080	JAKMIP2	NM_001270934	chr5	147040532	147040882	-2.46	-0.0571
1081	XPO6	NM_001270940	chr16	28164098	28167586	-2.37	-0.612
1082	JAKMIP2	NM_001270941	chr5	147040531	147040881	-2.56	-0.0913
1083	JAKMIP2	NM_001270941	chr5	146970983	146971183	-2.25	-0.478
1084	KLF7	NM_001270942	chr2	207945137	207945337	-3.09	-0.99
1085	KLF7	NM_001270942	chr2	207945485	207945984	-8.14	-1.17
1086	KLF7	NM_001270942	chr2	207988720	208030430	-3.58	-0.185
1087	KLF7	NM_001270943	chr2	207945501	207945901	-9.37	-1.17
1088	KLF7	NM_001270944	chr2	207945471	207945919	-8.98	-1.01
1089	KLF7	NM_001270944	chr2	207988552	207998811	-2.19	-0.0765
1090	DICER1	NM_001271282	chr14	95569776	95570076	-2.19	-0.577
1091	TTC19	NM_001271420	chr17	15903191	15903526	-3.22	0.603
1092	PPP1R12C	NM_001271618	chr19	55624146	55628721	-2.66	1.75
1093	RQCD1	NM_001271634	chr2	219459069	219459468	-2.37	-0.522
1094	DTNBP1	NM_001271667	chr6	15663045	15663192	-2.76	1.59
1095	DTNBP1	NM_001271668	chr6	15663045	15663192	-2.78	1.54
1096	GPR176	NM_001271854	chr15	40212148	40212398	-5.23	1.72
1097	GPR176	NM_001271854	chr15	40212496	40212795	-10.2	2.86
1098	BCKDK	NM_001271926	chr16	31123318	31123518	-3.54	-1.34
1099	MEGF8	NM_001271938	chr19	42880876	42881077	-4.21	-1.01
1100	ITPRIP	NM_001272013	chr10	106075174	106075324	-3.17	2.19
1101	LRRC14	NM_001272036	chr8	145747468	145748814	-3.57	-0.507
1102	AP1S2	NM_001272071	chrX	15870577	15872889	-2.82	1.48
1103	RGS3	NM_001276260	chr9	116345835	116346683	-6.8	1.46
1104	ATRNL1	NM_001276282	chr10	116853367	116853564	-4.45	-0.0862
1105	NOL3	NM_001276309	chr16	67208086	67208236	-2.54	1.26
1106	NOL3	NM_001276312	chr16	67207926	67208191	-4.31	1.56
1107	PPP1R3E	NM_001276318	chr14	23771657	23771957	-3.12	1.24
1108	PPP1R3E	NM_001276318	chr14	23770557	23770807	-2.23	0.859
1109	NOL3	NM_001276319	chr16	67207926	67208191	-4.31	1.56
1110	YOD1	NM_001276320	chr1	207221985	207222186	-2.97	1.17
1111	B4GALNT1	NM_001276468	chr12	58020420	58020718	-2.16	-0.833
1112	LONP1	NM_001276479	chr19	5714254	5720077	-3.07	1.27
1113	FMN1	NM_001277313	chr15	33065083	33065183	-2.98	0.911
1114	YTHDF3	NM_001277814	chr8	64099536	64099934	-2.21	-0.293
1115	YTHDF3	NM_001277815	chr8	64099562	64099963	-2.85	-0.205
1116	YTHDF3	NM_001277816	chr8	64099526	64099925	-2.28	-0.281
1117	YTHDF3	NM_001277818	chr8	64099529	64099928	-2.31	-0.32
1118	STIM1	NM_001277961	chr11	3877278	3877576	-2.78	-0.803
1119	STIM1	NM_001277962	chr11	3877280	3877579	-2.46	-0.697
1120	AKT1S1	NM_001278159	chr19	50376338	50379158	-2.6	0.848
1121	AKT1S1	NM_001278160	chr19	50376345	50381513	-3.07	0.931
1122	NUP153	NM_001278209	chr6	17706566	17707065	-2.74	0.954
1123	FAM131B	NM_001278297	chr7	143052832	143053978	-5.37	-0.281
1124	WIPI2	NM_001278299	chr7	5272840	5273387	-7.28	-0.696
1125	FRS2	NM_001278351	chr12	69968031	69968781	-3.49	-0.304
1126	FRS2	NM_001278353	chr12	69968037	69968786	-3.79	-0.433
1127	FRS2	NM_001278354	chr12	69967996	69968793	-3.29	-0.285
1128	FRS2	NM_001278355	chr12	69968010	69968806	-3.58	-0.224
1129	FRS2	NM_001278356	chr12	69968008	69968803	-3.49	-0.268
1130	FRS2	NM_001278357	chr12	69967999	69968796	-3.1	-0.249
1131	FNDC3A	NM_001278438	chr13	49781323	49781473	-2.14	-0.945
1132	ZNF229	NM_001278510	chr19	44934062	44934313	-5.07	-1.19
1133	ZNF518A	NM_001278524	chr10	97919721	97920021	-3.36	-0.597
1134	ZNF518A	NM_001278524	chr10	97916924	97917125	-3.35	-0.751
1135	ZNF518A	NM_001278525	chr10	97919540	97920038	-3.93	-0.706
1136	ZNF518A	NM_001278525	chr10	97916906	97917156	-2.2	-0.6
1137	PTPN1	NM_001278618	chr20	49127006	49127106	-3.03	0.965
1138	SNRPD3	NM_001278656	chr22	24951667	24951768	-4.95	2.66
1139	TGIF1	NM_001278684	chr18	3457666	3457914	-2.68	-0.735
1140	ZNF274	NM_001278734	chr19	58724129	58724679	-6.82	-0.827
1141	DPF3	NM_001280543	chr14	73137748	73137897	-4.31	0.0627
1142	DPF3	NM_001280544	chr14	73137748	73137898	-4.17	-0.00304
1143	ANP32E	NM_001280560	chr1	150208254	150208405	-4.12	-1.81
1144	PHB	NM_001281497	chr17	47481555	47481994	-3.97	0.932
1145	PHB	NM_001281715	chr17	47481555	47481996	-4.2	0.955
1146	FHOD3	NM_001281740	chr18	34289230	34298071	-2.16	-0.115
1147	SIK3	NM_001281748	chr11	116719981	116729153	-3	-0.429
1148	SSH2	NM_001282129	chr17	28256995	28257146	-2.28	1.01
1149	ABR	NM_001282149	chr17	908945	909344	-3.35	-0.334
1150	UBE2A	NM_001282161	chrX	118708577	118708676	-2.16	1.16
1151	BRSK2	NM_001282218	chr11	1483719	1483869	-3.13	-1.54
1152	JAKMIP2	NM_001282282	chr5	146970998	146971099	-2.6	-1.21
1153	ABCB8	NM_001282292	chr7	150725607	150730751	-2.66	1.24
1154	OSCAR	NM_001282350	chr19	54598178	54598425	-2.62	1.35
1155	ZMAT1	NM_001282401	chrX	101138905	101139206	-2.93	-0.658
1156	BLOC1S2	NM_001282437	chr10	102034923	102035024	-2.93	-1.23
1157	BLOC1S2	NM_001282438	chr10	102034923	102035024	-2.93	-1.23
1158	BLOC1S2	NM_001282439	chr10	102034907	102035007	-2.87	-1.21
1159	GNA12	NM_001282441	chr7	2769876	2769976	-7.75	-1.76
1160		NM_001282533	chr20	3145189	3146511	-5.44	0.732
1161	UBE2V1	NM_001282579	chr20	48697954	48698250	-2.51	-0.715
1162	LMNA	NM_001282625	chr1	156084584	156084735	-11.2	1.17
1163	LMNA	NM_001282626	chr1	156084609	156084759	-13.8	1.2
1164	SUSD1	NM_001282640	chr9	114803308	114803558	-3.66	-1.21
1165	SUSD1	NM_001282643	chr9	114803310	114803559	-3.92	-1.37
1166	C1orf86	NM_001282671	chr1	2116095	2116194	-2.87	-1.75
1167	C1orf86	NM_001282672	chr1	2115997	2116494	-8.69	-1.69
1168	FBXO31	NM_001282683	chr16	87363724	87363924	-2.59	0.994
1169	SUPT7L	NM_001282729	chr2	27880366	27883880	-4.55	-1.17
1170	SUPT7L	NM_001282732	chr2	27880307	27885065	-3.81	-1.08
1171	TRMU	NM_001282782	chr22	46731688	46733718	-2.37	1.14
1172	SMEK2	NM_001282850	chr2	55844561	55844810	-2.82	0.766
1173	TRPS1	NM_001282902	chr8	116426152	116427000	-3.47	1.13
1174	TRPS1	NM_001282902	chr8	116616453	116616703	-3.78	1.03
1175	TRPS1	NM_001282903	chr8	116426147	116426994	-3.51	1.22
1176	TRPS1	NM_001282903	chr8	116616446	116616696	-3.68	1.07
1177	CARF	NM_001282910	chr2	203848265	203848415	-2.36	-1.46
1178	RGS3	NM_001282922	chr9	116346379	116346580	-3.12	1.64
1179	RGS3	NM_001282922	chr9	116345979	116346280	-3.76	1.6
1180	RGS3	NM_001282923	chr9	116345849	116346692	-6.84	1.35
1181	JMJD1C	NM_001282948	chr10	64966421	64966571	-2.34	-0.744
1182	TLE3	NM_001282979	chr15	70389310	70390157	-4.34	0.644
1183	TLE3	NM_001282980	chr15	70389309	70390156	-4.37	0.651
1184	TRIB1	NM_001282985	chr8	126448429	126449612	-8.18	1.09
1185	TRIP12	NM_001284216	chr2	230632237	230632338	-2.72	-0.818
1186	MAP3K9	NM_001284230	chr14	71196970	71197370	-434	0.895
1187	MAP3K9	NM_001284232	chr14	71196988	71197389	-434	0.944
1188	WDR86	NM_001284260	chr7	151092910	151093204	-7.78	-1.68
1189	WDR86	NM_001284261	chr7	151092906	151093198	-7.4	-1.67
1190	ASCC3	NM_001284271	chr6	101296132	101296332	-3.08	-0.634
1191	VOPP1	NM_001284282	chr7	55539592	55539792	-2.74	-0.976
1192	VOPP1	NM_001284283	chr7	55539584	55539783	-3.08	-1
1193	VOPP1	NM_001284284	chr7	55539590	55539789	-2.83	-0.986
1194	SLC9A3	NM_001284351	chr5	472299	473047	-2.99	0.998
1195	SLC9A3	NM_001284351	chr5	473394	475771	-3.67	0.962
1196	RAB30	NM_001286059	chr11	82693023	82693324	-3.43	1
1197	RAB30	NM_001286060	chr11	82692960	82693360	-2.36	0.666
1198	RAB30	NM_001286061	chr11	82692908	82693358	-2.31	0.825
1199	RIC8A	NM_001286134	chr11	209762	210631	-7.43	-1.43
1200	FANCA	NM_001286167	chr16	89805625	89806403	-5.69	2.19
1201	SCAF8	NM_001286189	chr6	155153345	155153643	-2.17	0.647
1202	C12orf43	NM_001286192	chr12	121441058	121441304	-2.19	0.0151
1203	SCAF8	NM_001286194	chr6	155153330	155153680	-2.2	0.709
1204	C12orf43	NM_001286197	chr12	121441057	121441303	-2.42	0.105
1205	SCAF8	NM_001286199	chr6	155153329	155153729	-3.47	0.835
1206	KLHL32	NM_001286250	chr6	97587180	97587281	-3.44	3.89
1207	KLHL32	NM_001286250	chr6	97562066	97562267	-3.11	-1.01
1208	KLHL32	NM_001286251	chr6	97587179	97587280	-3.01	4.38
1209	KLHL32	NM_001286251	chr6	97562066	97562267	-3.11	-1.01
1210	KLHL32	NM_001286252	chr6	97562078	97562275	-3.42	-0.742
1211	TOMM40L	NM_001286373	chr1	161200092	161200487	-2.21	0.624
1212	SUMO3	NM_001286416	chr21	46233954	46237946	-4.87	1.12
1213	REV3L	NM_001286432	chr6	111696405	111696605	-2.15	0.746
1214	BAIAP3	NM_001286464	chr16	1399242	1399442	-2.16	0.18
1215	DNAJA3	NM_001286516	chr16	4505726	4505877	-2.48	1.26
1216	BCL7C	NM_001286526	chr16	30905174	30905324	-2.2	0.74
1217	BCL7C	NM_001286526	chr16	30845461	30846159	-4.49	-0.0399
1218	KIAA0513	NM_001286565	chr16	85126384	85126534	-3.85	2.14
1219	KIAA0513	NM_001286566	chr16	85126430	85126581	-3.85	1.96
1220	C2CD3	NM_001286577	chr11	73724255	73724505	-2.87	-1.36
1221	PHRF1	NM_001286581	chr11	607274	607772	-2.44	0.634
1222	PHRF1	NM_001286581	chr11	608317	608914	-4.81	1.04
1223	PHRF1	NM_001286582	chr11	608320	608916	-3.96	1.01
1224	PHRF1	NM_001286582	chr11	607278	607775	-2.47	0.652
1225	PHRF1	NM_001286583	chr11	608224	608968	-4.63	1.01
1226	PHRF1	NM_001286583	chr11	607233	607779	-2.18	0.596
1227	CDIPT	NM_001286585	chr16	29874215	29874511	-3.02	0.722
1228	ADD1	NM_001286645	chr4	2930612	2930762	-4.92	-1.37
1229	TBC1D4	NM_001286658	chr13	76055608	76056006	-2.29	0.745
1230	TBC1D4	NM_001286659	chr13	76055605	76056005	-2.71	0.886
1231	ZNF79	NM_001286697	chr9	130207451	130207601	-2.15	-1.03
1232	ANKRD10	NM_001286721	chr13	111545187	111545437	-2.55	0.574
1233	FAM120A	NM_001286722	chr9	96214477	96233429	-4.24	-1.34
1234	FAM120A	NM_001286724	chr9	96214474	96233425	-4.35	-1.35
1235	ANTXR2	NM_001286780	chr4	80828086	80828385	-2.3	-0.666
1236	ANTXR2	NM_001286781	chr4	80828114	80828364	-2.31	-0.648
1237	SPATA13	NM_001286792	chr13	24797164	24823706	-2.99	0.488
1238	TNFAIP8	NM_001286813	chr5	118729020	118729365	-7.21	1.48
1239	TNFAIP8	NM_001286814	chr5	118729051	118729351	-5.34	1.4
1240	CLCN7	NM_001287	chr16	1495679	1496226	-4.19	0.459
1241	ZKSCAN1	NM_001287054	chr7	99633327	99633777	-3.96	0.965
1242	ZKSCAN1	NM_001287054	chr7	99613274	99616878	-2.8	1.14
1243	ZKSCAN1	NM_001287055	chr7	99633326	99633776	-3.99	0.929
1244	COMMD5	NM_001287237	chr8	146076385	146076778	-2.77	1.02
1245	TET3	NM_001287491	chr2	74328010	74329309	-3.93	-0.0315
1246	SSFA2	NM_001287503	chr2	182756739	182757375	-2.82	0.598
1247	SSFA2	NM_001287504	chr2	182756739	182757375	-2.42	0.592
1248	FDFT1	NM_001287742	chr8	11660321	11666332	-2.4	0.417
1249	FDFT1	NM_001287743	chr8	11660321	11666332	-2.44	0.42
1250	DNAJC16	NM_001287811	chr1	15895385	15895536	-2.9	-1.57
1251	UBN1	NM_001288656	chr16	4902915	4903115	-3.59	1.06
1252	PPRC1	NM_001288727	chr10	103899833	103900033	-2.32	0.607
1253	PPRC1	NM_001288727	chr10	103899335	103899685	-6.32	0.645
1254	PPRC1	NM_001288728	chr10	103899334	103899683	-6.3	0.672
1255	PPRC1	NM_001288728	chr10	103899831	103900031	-2.19	0.595
1256	RMND5B	NM_001288794	chr5	177575178	177575326	-2.64	-1.09
1257	RMND5B	NM_001288795	chr5	177575179	177575327	-2.54	-1.04
1258	COX10	NM_001303	chr17	13980211	13980311	-2.95	1.66
1259	CLDN4	NM_001305	chr7	73246231	73246331	-2.8	1.08
1260	DNAJB4	NM_001317100	chr1	78478908	78479208	-2.41	0.699
1261	ST6GALNAC5	NM_001320274	chr1	77528779	77529030	-11.9	-1.23
1262	SLC30A4	NM_001321036	chr15	45814570	45814807	-3.2	2.77
1263	KLHL32	NM_001323256	chr6	97562070	97562270	-3.31	-0.777
1264	KLHL32	NM_001323258	chr6	97562067	97562268	-3.22	-0.971
1265	KLHL32	NM_001323259	chr6	97562079	97562276	-3.27	-0.804
1266	KLHL32	NM_001323262	chr6	97562042	97575284	-5.44	-1.12
1267	KLHL32	NM_001323262	chr6	97562042	97575284	-5.44	-1.12
1268	KLHL32	NM_001323262	chr6	97587189	97587290	-3.51	3.92
1269	KLHL32	NM_001323262	chr6	97587189	97587290	-3.51	3.92
1270	PISD	NM_001326414	chr22	32014824	32015172	-2.3	0.416
1271	PISD	NM_001326416	chr22	32014826	32015175	-2.18	0.392
1272	PISD	NM_001326417	chr22	32014825	32015173	-2.21	0.417
1273	PISD	NM_001326418	chr22	32014825	32015172	-2.19	0.395
1274	SP4	NM_001326543	chr7	21550695	21550945	-2.5	1.07
1275	CTBP1	NM_001328	chr4	1205774	1205974	-2.65	-0.576
1276	ARHGAP29	NM_001328664	chr1	94639498	94640147	-4.38	0.2
1277	ARHGAP29	NM_001328665	chr1	94639505	94640155	-5.58	0.235
1278	ARHGAP29	NM_001328666	chr1	94639506	94640156	-6.18	0.18
1279	ARHGAP29	NM_001328667	chr1	94639500	94640150	-4.81	0.149
1280	VMP1	NM_001329395	chr17	57785073	57812709	-2.9	1.35
1281	VMP1	NM_001329396	chr17	57785073	57812709	-2.9	1.35
1282	VMP1	NM_001329397	chr17	57785072	57812708	-2.93	1.31
1283	VMP1	NM_001329398	chr17	57785073	57812710	-2.93	1.35
1284	VMP1	NM_001329399	chr17	57785074	57812711	-2.89	1.34
1285	VMP1	NM_001329400	chr17	57785073	57812710	-2.93	1.35
1286	VMP1	NM_001329402	chr17	57785074	57814827	-2.44	1.26
1287	ZNF420	NM_001329520	chr19	37619531	37619631	-2.81	-1.92
1288	ZBED3	NM_001329564	chr5	76372598	76373372	-2.27	0.124
1289	CD276	NM_001329629	chr15	74005522	74005671	-4.52	-0.905
1290	CAND1	NM_001329674	chr12	67706581	67706731	-2.17	-1.56
1291	CAND1	NM_001329675	chr12	67706583	67706733	-2.46	-1.57
1292	CAND1	NM_001329676	chr12	67706586	67706736	-2.3	-1.51
1293	PLEKHG1	NM_001329803	chr6	151152091	151152241	-2.99	-0.656
1294	PNO1	NM_001329916	chr2	68401933	68402083	-4.22	1.44
1295	DHX57	NM_001329963	chr2	39095499	39103025	-3.12	1.8
1296	NUDCD2	NM_001329991	chr5	162883996	162884578	-2.46	1.15
1297	ASB1	NM_001330196	chr2	239355202	239355403	-3.48	-1.4
1298	MED24	NM_001330211	chr17	38175697	38175847	-3.28	-1.28
1299	CNP	NM_001330216	chr17	40120097	40120247	-2.48	1.13
1300	PSME3	NM_001330229	chr17	40985513	40985664	-2.59	1.16
1301	HNRNPA3	NM_001330251	chr2	178086399	178086599	-2.76	-1.38
1302	UBIAD1	NM_001330350	chr1	11333602	11333752	-2.17	1.11
1303	ZNF561	NM_001330365	chr19	9721232	9721431	-2.77	-0.689
1304	CLUAP1	NM_001330454	chr16	3586223	3586423	-2.33	-1.26
1305	TACC1	NM_001330521	chr8	38677631	38677831	-2.97	-0.686
1306	ZC3H13	NM_001330565	chr13	46531086	46531335	-2.86	-0.842
1307	ZC3H13	NM_001330567	chr13	46531084	46531334	-2.94	-0.794
1308	ZNF711	NM_001330574	chrX	84526730	84527078	-2.71	1.11
1309	DERL1	NM_001330601	chr8	124027438	124027638	-2.66	-0.963
1310	TTC3	NM_001330683	chr21	38525525	38529105	-2.51	-0.886
1311	ZNF131	NM_001330708	chr5	43174601	43175391	-2.39	0.166
1312	ZNF131	NM_001330717	chr5	43174600	43175390	-2.32	0.174
1313	PI4KB	NM_001330721	chr1	151288122	151288519	-2.92	0.675
1314	ZNF518A	NM_001330734	chr10	97916923	97917124	-3.47	-0.763
1315	ZNF518A	NM_001330734	chr10	97916923	97917124	-3.47	-0.763
1316	ZNF518A	NM_001330734	chr10	97919570	97920021	-3.19	-0.624
1317	ZNF518A	NM_001330734	chr10	97919570	97920021	-3.19	-0.624
1318	ZNF518A	NM_001330736	chr10	97916896	97917146	-2.74	-0.737
1319	ZNF518A	NM_001330736	chr10	97916896	97917146	-2.74	-0.737
1320	ZNF518A	NM_001330736	chr10	97919534	97920033	-3.22	-0.655
1321	ZNF518A	NM_001330736	chr10	97919534	97920033	-3.22	-0.655
1322	SLC25A25	NM_001330988	chr9	130869888	130870087	-2.41	0.546
1323	CTNND1	NM_001331	chr11	57569418	57569568	-5.06	-0.99
1324	PPP1R12B	NM_001331029	chr1	202555348	202555549	-3.58	1.98
1325	TMEM121	NM_001331238	chr14	105996244	105996392	-7.14	1.63
1326	TMEM121	NM_001331238	chr14	105996244	105996392	-7.14	1.63
1327	TMEM121	NM_001331238	chr14	105995165	105996147	-9.99	0.532
1328	TMEM121	NM_001331238	chr14	105995165	105996147	-9.99	0.532
1329	C19orf57	NM_001345843	chr19	14000598	14000947	-2.19	0.68
1330	ZNF394	NM_001345968	chr7	99097483	99097832	-2.74	0.981
1331	KLHL26	NM_001345981	chr19	18778924	18779571	-2.15	-0.452
1332	KLHL26	NM_001345983	chr19	18778910	18780360	-3.21	-0.319
1333	DGKG	NM_001346	chr3	185865733	185866081	-11.4	-0.635
1334	TRIM52	NM_001346049	chr5	180687372	180687572	-2.14	0.147
1335	TRIM52	NM_001346051	chr5	180687374	180687573	-2.29	0.321
1336	PPAN	NM_001346139	chr19	10221786	10222183	-2.41	0.556
1337		NM_001346140	chr19	10221786	10222183	-2.41	0.556
1338	TAOK3	NM_001346490	chr12	118704563	118810601	-2.24	0.747
1339	SASH1	NM_001346506	chr6	148865007	148865755	-2.67	0.329
1340	SASH1	NM_001346507	chr6	148864992	148865743	-2.47	0.309
1341	SASH1	NM_001346508	chr6	148841304	148841504	-3.04	1.42
1342	SASH1	NM_001346508	chr6	148841304	148841504	-3.04	1.42
1343	SASH1	NM_001346508	chr6	148864999	148865748	-2.7	0.326
1344	SASH1	NM_001346508	chr6	148864999	148865748	-2.7	0.326
1345	SASH1	NM_001346509	chr6	148841310	148841510	-2.41	1.18
1346	SASH1	NM_001346509	chr6	148841310	148841510	-2.41	1.18
1347	SASH1	NM_001346509	chr6	148865003	148865752	-2.65	0.335
1348	SASH1	NM_001346509	chr6	148865003	148865752	-2.65	0.335
1349	PIGW	NM_001346754	chr17	34893058	34893159	-2.5	1.23
1350	MYO18A	NM_001346765	chr17	27449264	27493816	-2.17	0.548
1351	MYO18A	NM_001346766	chr17	27449267	27493817	-2.2	0.52
1352	PPP1R35	NM_001346938	chr7	100033858	100034001	-3.04	0.794
1353	ERLIN1	NM_001347859	chr10	101911485	101912032	-2.5	0.554
1354	SNX19	NM_001347918	chr11	130784395	130784595	-3.29	-0.843
1355	ZNF606	NM_001348023	chr19	58490207	58490505	-5.2	-0.823
1356	ZNF606	NM_001348024	chr19	58490213	58490513	-4.14	-0.714
1357	ZNF606	NM_001348025	chr19	58490254	58490503	-4.01	-0.704
1358	FBXO30	NM_001348092	chr6	146125764	146126212	-2.18	0.847
1359	TRIM16	NM_001348120	chr17	15554750	15554899	-2.5	1.22
1360	TRIP12	NM_001348326	chr2	230723978	230724229	-2.45	-0.771
1361	TRIP12	NM_001348330	chr2	230723981	230724231	-2.19	-0.689
1362	TRIP12	NM_001348334	chr2	230723978	230724229	-2.45	-0.771
1363	KIAA1257	NM_001348520	chr3	128651580	128651778	-2.53	-0.503
1364	KIAA1257	NM_001348521	chr3	128651583	128651782	-2.48	-0.485
1365	KNOP1	NM_001348527	chr16	19718261	19718458	-2.65	-0.62
1366	KNOP1	NM_001348528	chr16	19718268	19718468	-2.31	-0.59
1367	KNOP1	NM_001348534	chr16	19718267	19718466	-2.76	-0.649
1368	KNOP1	NM_001348535	chr16	19718266	19718465	-2.85	-0.633
1369	KNOP1	NM_001348537	chr16	19718265	19718464	-2.82	-0.62
1370	ANKRD9	NM_001348651	chr14	102972711	102974249	-7.61	0.683
1371	ANKRD9	NM_001348652	chr14	102972683	102974232	-7.61	0.681
1372	C1orf216	NM_001348691	chr1	36179871	36180020	-3.54	1.56
1373	DENND5A	NM_001348750	chr11	9215219	9225698	-3.28	-0.787
1374	NXPE3	NM_001348991	chr3	101540477	101541028	-2.3	0.142
1375	NXPE3	NM_001348997	chr3	101540479	101541029	-2.33	0.154
1376	ST6GALNAC3	NM_001349105	chr1	77094486	77094834	-3.83	-0.114
1377	ST6GALNAC3	NM_001349106	chr1	77094488	77094836	-3.58	0.117
1378	ST6GALNAC3	NM_001349107	chr1	77094489	77094836	-3.66	0.1
1379	ST6GALNAC3	NM_001349108	chr1	77094530	77094929	-3.05	0.0238
1380	ST6GALNAC3	NM_001349111	chr1	77094527	77094827	-2.62	0.448
1381	PDE4D	NM_001349243	chr5	58270542	58270791	-12.4	-2.66
1382	TRAK1	NM_001349245	chr3	42265347	42265596	-4.18	-1.17
1383	TRAK1	NM_001349247	chr3	42265391	42265591	-4.07	-1.25
1384	FOXP1	NM_001349337	chr3	71008299	71008450	-3.04	-1.6
1385	FOXP1	NM_001349344	chr3	71008301	71008451	-3.11	-1.62
1386	KLHL24	NM_001349414	chr3	183396965	183397265	-3.25	0.798
1387	KLHL24	NM_001349414	chr3	183396965	183397265	-3.25	0.798
1388	KLHL24	NM_001349414	chr3	183368715	183368816	-2.91	1.65
1389	KLHL24	NM_001349414	chr3	183368715	183368816	-2.91	1.65
1390	KLHL24	NM_001349415	chr3	183396961	183397262	-3.36	0.824
1391	KLHL24	NM_001349415	chr3	183396961	183397262	-3.36	0.824
1392	KLHL24	NM_001349415	chr3	183368711	183368862	-2.19	1.17
1393	KLHL24	NM_001349415	chr3	183368711	183368862	-2.19	1.17
1394	KLHL24	NM_001349417	chr3	183396955	183397256	-3.25	0.745
1395	KLHL24	NM_001349417	chr3	183396955	183397256	-3.25	0.745
1396	KLHL24	NM_001349417	chr3	183368704	183368855	-2.42	1.29
1397	KLHL24	NM_001349417	chr3	183368704	183368855	-2.42	1.29
1398	KLHL24	NM_001349418	chr3	183396958	183397159	-2.36	0.67
1399	KLHL24	NM_001349424	chr3	183368716	183368816	-2.81	1.65
1400		NM_001349427	chr3	183396958	183397159	-2.36	0.67
1401	KLHL24	NM_001349429	chr3	183396961	183397162	-2.68	0.728
1402	SNRPN	NM_001349455	chr15	25207277	25213098	-2.19	0.812
1403	SNRPN	NM_001349459	chr15	25207267	25213089	-3.06	0.839
1404	GPR161	NM_001349635	chr1	168053851	168053951	-3.6	-0.958
1405	CEMIP2	NM_001349784	chr9	74300028	74300228	-4.28	-1.38
1406	RBFOX2	NM_001349999	chr22	36424335	36424485	-2.45	1.48
1407	RCOR3	NM_001350069	chr1	211487049	211487298	-4.4	-1.37
1408	RCOR3	NM_001350070	chr1	211486998	211487296	-3.6	-1.11
1409	ZMYM4	NM_001350139	chr1	35885354	35885703	-2.89	-0.557
1410	ZMYM4	NM_001350140	chr1	35885361	35885710	-3.62	-0.627
1411	PSRC1	NM_001350237	chr1	109822325	109822675	-2.24	-0.622
1412	PSRC1	NM_001350241	chr1	109822325	109822676	-2.38	-0.655
1413	EPB41L2	NM_001350301	chr6	131190869	131191019	-3.14	-0.712
1414	LATS1	NM_001350339	chr6	150004876	150005226	-4.28	0.589
1415	LATS1	NM_001350340	chr6	150004876	150005225	-4.31	0.584
1416	LATS1	NM_001350392	chr6	150004881	150005230	-3.35	0.497
1417	PDE4DIP	NM_001350521	chr1	144851972	144852073	-3.12	1.84
1418	PDE4DIP	NM_001350522	chr1	144851970	144852070	-3.17	1.86
1419	TJAP1	NM_001350568	chr6	43473502	43473601	-2.52	1.19
1420	BRAT1	NM_001350627	chr7	2581821	2583277	-9.2	-4.43
1421	BRAT1	NM_001350627	chr7	2581821	2583277	-9.2	-4.43
1422	BRAT1	NM_001350627	chr7	2581821	2583277	-9.2	-4.43
1423	BRAT1	NM_001350627	chr7	2583375	2583573	-434	-6.06
1424	BRAT1	NM_001350627	chr7	2583375	2583573	-434	-6.06
1425	BRAT1	NM_001350627	chr7	2583375	2583573	-434	-6.06
1426	BRAT1	NM_001350627	chr7	2581008	2581108	-3.75	-2.82
1427	BRAT1	NM_001350627	chr7	2581008	2581108	-3.75	-2.82
1428	BRAT1	NM_001350627	chr7	2581008	2581108	-3.75	-2.82
1429	PRKCZ	NM_001350803	chr1	2116070	2116492	-3.9	-1.97
1430	PRKCZ	NM_001350804	chr1	2116067	2116490	-3.84	-1.97
1431	PRKCZ	NM_001350805	chr1	2116071	2116492	-3.85	-1.92
1432	PRKCZ	NM_001350806	chr1	2116064	2116488	-3.33	-2
1433	GRB10	NM_001350815	chr7	50660350	50660550	-4.28	-0.81
1434	AHNAK2	NM_001350929	chr14	105419912	105420712	-3.5	0.967
1435	AHNAK2	NM_001350929	chr14	105419912	105420712	-3.5	0.967
1436	AHNAK2	NM_001350929	chr14	105417715	105417866	-5.17	0.993
1437	AHNAK2	NM_001350929	chr14	105417715	105417866	-5.17	0.993
1438	AFAP1L2	NM_001351064	chr10	116055628	116055729	-2.73	1.52
1439	AFAP1L2	NM_001351065	chr10	116055627	116055728	-2.74	1.56
1440	AFAP1L2	NM_001351067	chr10	116055631	116055732	-2.83	1.52
1441	AFAP1L2	NM_001351068	chr10	116055629	116055730	-2.71	1.49
1442	AFAP1L2	NM_001351071	chr10	116055631	116055731	-2.84	1.53
1443	AFAP1L2	NM_001351072	chr10	116055630	116055731	-2.9	1.56
1444	AFAP1L2	NM_001351075	chr10	116055631	116055732	-2.83	1.52
1445	AFAP1L2	NM_001351076	chr10	116055628	116055729	-2.73	1.52
1446	AFAP1L2	NM_001351080	chr10	116055627	116055728	-2.74	1.56
1447	TRDMT1	NM_001351219	chr10	17184132	17184633	-6.34	-1.29
1448	TRDMT1	NM_001351221	chr10	17184218	17184568	-5.47	-1.35
1449	CORO6	NM_001351302	chr17	27942466	27942566	-2.35	-0.964
1450	KCTD1	NM_001351443	chr18	24035559	24035707	-2.59	-0.631
1451	ZNF292	NM_001351444	chr6	87970879	87971477	-3.22	-0.89
1452	RGS3	NM_001351526	chr9	116345985	116346285	-3.87	1.67
1453	RGS3	NM_001351526	chr9	116345985	116346285	-3.87	1.67
1454	RGS3	NM_001351526	chr9	116346383	116346584	-3.44	1.75
1455	RGS3	NM_001351526	chr9	116346383	116346584	-3.44	1.75
1456	SETX	NM_001351528	chr9	135202223	135202374	-3.47	-1.3
1457	TLE4	NM_001351562	chr9	82187187	82187638	-7.94	-0.999
1458	POLI	NM_001351613	chr18	51820474	51820923	-2.15	-0.633
1459	POLI	NM_001351616	chr18	51820507	51820908	-2.34	-0.629
1460	POLI	NM_001351620	chr18	51820583	51820932	-3.1	-0.799
1461	PLEKHG2	NM_001351693	chr19	39913887	39914287	-5.64	-0.759
1462	PLEKHG2	NM_001351693	chr19	39913887	39914287	-5.64	-0.759
1463	PLEKHG2	NM_001351693	chr19	39915411	39916265	-5.07	-0.813
1464	PLEKHG2	NM_001351693	chr19	39915411	39916265	-5.07	-0.813
1465	PLEKHG2	NM_001351694	chr19	39915935	39916283	-4.57	-0.831
1466	RAPGEF2	NM_001351724	chr4	160274769	160275069	-2.92	-0.607
1467	RAPGEF2	NM_001351725	chr4	160274767	160275067	-2.47	-0.565
1468	RAPGEF2	NM_001351727	chr4	160274766	160275067	-2.47	-0.565
1469	RAPGEF2	NM_001351728	chr4	160274767	160275067	-2.67	-0.592
1470	CARD8	NM_001351784	chr19	48714415	48715110	-3.25	-0.196
1471	CARD8	NM_001351786	chr19	48714433	48714933	-2.16	-0.128
1472	CARD8	NM_001351789	chr19	48714416	48715111	-3.04	-0.0966
1473	CARD8	NM_001351790	chr19	48714370	48715115	-3.02	-0.0717
1474	CARD8	NM_001351792	chr19	48714369	48715115	-3.03	-0.0991
1475	PPFIBP2	NM_001351860	chr11	7674597	7674896	-2.3	0.0848
1476	LMBR1L	NM_001352161	chr12	49491267	49491367	-4.81	-1.78
1477	LMBR1L	NM_001352162	chr12	49491268	49491367	-4.92	-1.83
1478	LMBR1L	NM_001352166	chr12	49491266	49491366	-4.81	-1.78
1479	LMBR1L	NM_001352167	chr12	49491272	49491372	-5.22	-2.01
1480	ZNF333	NM_001352239	chr19	14829175	14829524	-2.39	-0.422
1481	ZNF333	NM_001352240	chr19	14829177	14829526	-2.62	-0.512
1482	ZNF333	NM_001352241	chr19	14829175	14829525	-2.38	-0.419
1483	ZNF333	NM_001352244	chr19	14829173	14829522	-2.16	-0.418
1484	ZNF529	NM_001352272	chr19	37038194	37039139	-6.11	-0.899
1485	ZNF529	NM_001352273	chr19	37038187	37039130	-6.42	-0.963
1486	RHOT2	NM_001352292	chr16	718230	718521	-2.37	0.94
1487	ZNF841	NM_001352299	chr19	52568764	52569064	-2.24	-0.644
1488	ZNF248	NM_001352486	chr10	38118491	38118642	-2.24	1.06
1489	ZNF248	NM_001352487	chr10	38118490	38118641	-2.49	1.16
1490	ZNF248	NM_001352488	chr10	38118488	38118639	-2.27	1.04
1491	ZNF248	NM_001352492	chr10	38118491	38118642	-2.24	1.06
1492	SLC19A1	NM_001352510	chr21	46935514	46935962	-3.52	0.846
1493	SLC19A1	NM_001352511	chr21	46951388	46951537	-2.42	1.01
1494	SLC19A1	NM_001352512	chr21	46935510	46935958	-3.22	0.75
1495	CARF	NM_001352678	chr2	203848254	203848454	-3.63	-2.3
1496	CARF	NM_001352679	chr2	203848262	203848412	-2.53	-1.53
1497	PTK2	NM_001352694	chr8	141669472	141669572	-2.46	-0.358
1498	PTK2	NM_001352697	chr8	141669472	141669572	-2.46	-0.358
1499	PTK2	NM_001352698	chr8	141669472	141669572	-2.46	-0.358
1500	PTK2	NM_001352699	chr8	141669472	141669572	-2.46	-0.358
1501	PTK2	NM_001352700	chr8	141669479	141669580	-2.98	-0.512
1502	PTK2	NM_001352701	chr8	141669476	141669577	-2.38	-0.397
1503	PTK2	NM_001352702	chr8	141669477	141669577	-2.45	-0.431
1504	PTK2	NM_001352703	chr8	141669472	141669572	-2.46	-0.358
1505	PTK2	NM_001352704	chr8	141669472	141669572	-2.4	-0.362
1506	PTK2	NM_001352705	chr8	141669475	141669575	-2.53	-0.406
1507	PTK2	NM_001352706	chr8	141669471	141669572	-2.37	-0.351
1508	PTK2	NM_001352707	chr8	141669475	141669575	-2.53	-0.406
1509	PTK2	NM_001352708	chr8	141669473	141669574	-2.74	-0.387
1510	PTK2	NM_001352710	chr8	141669475	141669576	-2.38	-0.371
1511	PTK2	NM_001352711	chr8	141669471	141669571	-2.66	-0.39
1512	PTK2	NM_001352716	chr8	141669475	141669575	-2.53	-0.406
1513	PTK2	NM_001352719	chr8	141669476	141669576	-2.38	-0.371
1514	PTK2	NM_001352720	chr8	141669474	141669574	-2.78	-0.4
1515	PTK2	NM_001352721	chr8	141669430	141669581	-2.75	-0.391
1516	PTK2	NM_001352723	chr8	141669477	141669578	-2.56	-0.468
1517	PTK2	NM_001352724	chr8	141669473	141669574	-2.74	-0.387
1518	PTK2	NM_001352727	chr8	141669473	141669573	-2.64	-0.369
1519	PTK2	NM_001352728	chr8	141669470	141669570	-2.4	-0.355
1520	PTK2	NM_001352729	chr8	141669478	141669578	-2.72	-0.47
1521	PTK2	NM_001352730	chr8	141669475	141669576	-2.38	-0.371
1522	PTK2	NM_001352731	chr8	141669471	141669572	-2.37	-0.351
1523	PTK2	NM_001352732	chr8	141669473	141669573	-2.58	-0.361
1524	PTK2	NM_001352734	chr8	141669472	141669572	-2.4	-0.362
1525	PTK2	NM_001352735	chr8	141669474	141669574	-2.73	-0.391
1526	PTK2	NM_001352736	chr8	141669472	141669572	-2.46	-0.358
1527	PTK2	NM_001352737	chr8	141669475	141669575	-2.52	-0.404
1528	PTK2	NM_001352742	chr8	141669476	141669576	-2.38	-0.371
1529	PTK2	NM_001352743	chr8	141669473	141669574	-2.74	-0.387
1530	PTK2	NM_001352744	chr8	141669477	141669577	-2.55	-0.448
1531	PTK2	NM_001352745	chr8	141669472	141669573	-2.61	-0.365
1532	PTK2	NM_001352746	chr8	141669474	141669574	-2.78	-0.4
1533	PTK2	NM_001352747	chr8	141669478	141669578	-2.72	-0.47
1534	PTK2	NM_001352749	chr8	141669476	141669576	-2.5	-0.397
1535	PTK2	NM_001352751	chr8	141669471	141669571	-2.66	-0.39
1536	TACC1	NM_001352779	chr8	38677631	38677832	-2.97	-0.689
1537	TACC1	NM_001352788	chr8	38677634	38677835	-2.32	-0.485
1538	TACC1	NM_001352797	chr8	38677635	38677835	-2.32	-0.482
1539	TACC1	NM_001352799	chr8	38677630	38677830	-2.54	-0.643
1540	TACC1	NM_001352802	chr8	38677636	38677835	-2.27	-0.471
1541	SGSH	NM_001352921	chr17	78183773	78184573	-6.51	0.849
1542	SGSH	NM_001352921	chr17	78183773	78184573	-6.51	0.849
1543	SGSH	NM_001352921	chr17	78183474	78183574	-2.25	1.35
1544	SGSH	NM_001352921	chr17	78183474	78183574	-2.25	1.35
1545	SGSH	NM_001352922	chr17	78183471	78183571	-2.41	1.52
1546	SGSH	NM_001352922	chr17	78183471	78183571	-2.41	1.52
1547	SGSH	NM_001352922	chr17	78183768	78184562	-6.68	0.888
1548	SGSH	NM_001352922	chr17	78183768	78184562	-6.68	0.888
1549	TRIM16L	NM_001353219	chr17	18638498	18638646	-5.1	2.04
1550	TRIM16L	NM_001353220	chr17	18638496	18638645	-4.99	2.04
1551	TRIM16L	NM_001353221	chr17	18638497	18638646	-5.1	2.04
1552	TRIM16L	NM_001353222	chr17	18638496	18638645	-4.99	2.04
1553	TRIM16L	NM_001353223	chr17	18638491	18638641	-4.21	1.78
1554	TRIM16L	NM_001353224	chr17	18638499	18638647	-5.21	2.04
1555	TRIM16L	NM_001353225	chr17	18638490	18638640	-4.87	2.04
1556	NOM1	NM_001353366	chr7	156742516	156743364	-13.3	0.893
1557	NDUFAF8	NM_001353403	chr17	79213375	79213473	-3.91	1.42
1558	ZNF416	NM_001353405	chr19	58084721	58084920	-2.45	-1.03
1559	ABCD4	NM_001353591	chr14	74752873	74753172	-2.47	-0.626
1560	ABCD4	NM_001353609	chr14	74752874	74753173	-2.15	-0.575
1561	UPF3A	NM_001353645	chr13	115067478	115070542	-2.28	-0.669
1562	UPF3A	NM_001353648	chr13	115070399	115070499	-2.15	-0.877
1563	WDR20	NM_001353680	chr14	102689233	102689379	-2.2	-1.64
1564	WDR20	NM_001353681	chr14	102689224	102689372	-2.34	-1.68
1565	ARHGEF9	NM_001353924	chrX	62974483	62974932	-2.15	0.576
1566	ARHGEF9	NM_001353926	chrX	62974484	62974932	-2.2	0.561
1567	ARHGEF9	NM_001353927	chrX	62974484	62974932	-2.27	0.56
1568	ARHGEF9	NM_001353928	chrX	62974483	62974932	-2.15	0.576
1569	TTC3	NM_001353936	chr21	38525525	38529104	-2.71	-0.924
1570	BICD1	NM_001354186	chr12	32259790	32260140	-2.19	0.804
1571	BICD1	NM_001354188	chr12	32259790	32260140	-2.37	0.878
1572	BICD1	NM_001354189	chr12	32259790	32260140	-2.19	0.804
1573	ST3GAL5	NM_001354247	chr2	86067147	86067396	-5.26	1.03
1574	ST3GAL5	NM_001354248	chr2	86067143	86067391	-5.19	1.18
1575	KANK1	NM_001354331	chr9	710980	711081	-3.89	1.26
1576	KANK1	NM_001354331	chr9	710980	711081	-3.89	1.26
1577	KANK1	NM_001354331	chr9	710980	711081	-3.89	1.26
1578	KANK1	NM_001354331	chr9	712323	712473	-8.74	1.57
1579	KANK1	NM_001354331	chr9	712323	712473	-8.74	1.57
1580	KANK1	NM_001354331	chr9	712323	712473	-8.74	1.57
1581	KANK1	NM_001354331	chr9	712969	713368	-12.2	1.6
1582	KANK1	NM_001354331	chr9	712969	713368	-12.2	1.6
1583	KANK1	NM_001354331	chr9	712969	713368	-12.2	1.6
1584	KANK1	NM_001354332	chr9	712913	713361	-11.9	1.46
1585	KANK1	NM_001354332	chr9	712913	713361	-11.9	1.46
1586	KANK1	NM_001354332	chr9	712913	713361	-11.9	1.46
1587	KANK1	NM_001354332	chr9	710979	711079	-4	1.31
1588	KANK1	NM_001354332	chr9	710979	711079	-4	1.31
1589	KANK1	NM_001354332	chr9	710979	711079	-4	1.31
1590	KANK1	NM_001354332	chr9	712318	712517	-11.2	1.61
1591	KANK1	NM_001354332	chr9	712318	712517	-11.2	1.61
1592	KANK1	NM_001354332	chr9	712318	712517	-11.2	1.61
1593	KANK1	NM_001354333	chr9	712898	713348	-11.7	1.29
1594	KANK1	NM_001354333	chr9	712898	713348	-11.7	1.29
1595	KANK1	NM_001354333	chr9	712348	712499	-9.82	1.58
1596	KANK1	NM_001354333	chr9	712348	712499	-9.82	1.58
1597	KANK1	NM_001354335	chr9	712897	713347	-12.2	1.38
1598	KANK1	NM_001354335	chr9	712897	713347	-12.2	1.38
1599	KANK1	NM_001354335	chr9	712347	712498	-10.3	1.61
1600	KANK1	NM_001354335	chr9	712347	712498	-10.3	1.61
1601	KANK1	NM_001354336	chr9	712331	712481	-8.17	1.4
1602	KANK1	NM_001354336	chr9	712331	712481	-8.17	1.4
1603	KANK1	NM_001354336	chr9	712925	713372	-12.1	1.47
1604	KANK1	NM_001354336	chr9	712925	713372	-12.1	1.47
1605	KANK1	NM_001354337	chr9	712900	713350	-12.3	1.37
1606	KANK1	NM_001354337	chr9	712900	713350	-12.3	1.37
1607	KANK1	NM_001354337	chr9	712900	713350	-12.3	1.37
1608	KANK1	NM_001354337	chr9	712351	712502	-9.78	1.53
1609	KANK1	NM_001354337	chr9	712351	712502	-9.78	1.53
1610	KANK1	NM_001354337	chr9	712351	712502	-9.78	1.53
1611	KANK1	NM_001354337	chr9	710954	711055	-5.29	1.33
1612	KANK1	NM_001354337	chr9	710954	711055	-5.29	1.33
1613	KANK1	NM_001354337	chr9	710954	711055	-5.29	1.33
1614	KANK1	NM_001354338	chr9	710953	711054	-5.32	1.36
1615	KANK1	NM_001354338	chr9	710953	711054	-5.32	1.36
1616	KANK1	NM_001354338	chr9	710953	711054	-5.32	1.36
1617	KANK1	NM_001354338	chr9	712350	712500	-9.59	1.54
1618	KANK1	NM_001354338	chr9	712350	712500	-9.59	1.54
1619	KANK1	NM_001354338	chr9	712350	712500	-9.59	1.54
1620	KANK1	NM_001354338	chr9	712898	713348	-11.7	1.3
1621	KANK1	NM_001354338	chr9	712898	713348	-11.7	1.3
1622	KANK1	NM_001354338	chr9	712898	713348	-11.7	1.3
1623	KANK1	NM_001354339	chr9	712930	713376	-11.8	1.35
1624	KANK1	NM_001354339	chr9	712930	713376	-11.8	1.35
1625	KANK1	NM_001354339	chr9	712336	712485	-8.45	1.45
1626	KANK1	NM_001354339	chr9	712336	712485	-8.45	1.45
1627	KANK1	NM_001354340	chr9	710957	711058	-6.22	1.48
1628	KANK1	NM_001354340	chr9	710957	711058	-6.22	1.48
1629	KANK1	NM_001354340	chr9	710957	711058	-6.22	1.48
1630	KANK1	NM_001354340	chr9	712900	713350	-11.6	1.24
1631	KANK1	NM_001354340	chr9	712900	713350	-11.6	1.24
1632	KANK1	NM_001354340	chr9	712900	713350	-11.6	1.24
1633	KANK1	NM_001354340	chr9	712352	712503	-9.11	1.48
1634	KANK1	NM_001354340	chr9	712352	712503	-9.11	1.48
1635	KANK1	NM_001354340	chr9	712352	712503	-9.11	1.48
1636	KANK1	NM_001354341	chr9	710973	711074	-3.98	1.31
1637	KANK1	NM_001354341	chr9	710973	711074	-3.98	1.31
1638	KANK1	NM_001354341	chr9	710973	711074	-3.98	1.31
1639	KANK1	NM_001354341	chr9	712315	712515	-10.5	1.5
1640	KANK1	NM_001354341	chr9	712315	712515	-10.5	1.5
1641	KANK1	NM_001354341	chr9	712315	712515	-10.5	1.5
1642	KANK1	NM_001354341	chr9	712912	713360	-12.7	1.51
1643	KANK1	NM_001354341	chr9	712912	713360	-12.7	1.51
1644	KANK1	NM_001354341	chr9	712912	713360	-12.7	1.51
1645	KANK1	NM_001354342	chr9	712321	712471	-8.84	1.56
1646	KANK1	NM_001354342	chr9	712321	712471	-8.84	1.56
1647	KANK1	NM_001354342	chr9	712321	712471	-8.84	1.56
1648	KANK1	NM_001354342	chr9	710978	711079	-4.15	1.36
1649	KANK1	NM_001354342	chr9	710978	711079	-4.15	1.36
1650	KANK1	NM_001354342	chr9	710978	711079	-4.15	1.36
1651	KANK1	NM_001354342	chr9	712918	713367	-11.8	1.47
1652	KANK1	NM_001354342	chr9	712918	713367	-11.8	1.47
1653	KANK1	NM_001354342	chr9	712918	713367	-11.8	1.47
1654	KANK1	NM_001354343	chr9	712319	712519	-10.7	1.5
1655	KANK1	NM_001354343	chr9	712319	712519	-10.7	1.5
1656	KANK1	NM_001354343	chr9	712319	712519	-10.7	1.5
1657	KANK1	NM_001354343	chr9	712916	713365	-11.9	1.48
1658	KANK1	NM_001354343	chr9	712916	713365	-11.9	1.48
1659	KANK1	NM_001354343	chr9	712916	713365	-11.9	1.48
1660	KANK1	NM_001354343	chr9	710975	711075	-4.02	1.32
1661	KANK1	NM_001354343	chr9	710975	711075	-4.02	1.32
1662	KANK1	NM_001354343	chr9	710975	711075	-4.02	1.32
1663	KANK1	NM_001354344	chr9	712316	712516	-11.2	1.59
1664	KANK1	NM_001354344	chr9	712316	712516	-11.2	1.59
1665	KANK1	NM_001354344	chr9	712316	712516	-11.2	1.59
1666	KANK1	NM_001354344	chr9	712912	713359	-12.5	1.46
1667	KANK1	NM_001354344	chr9	712912	713359	-12.5	1.46
1668	KANK1	NM_001354344	chr9	712912	713359	-12.5	1.46
1669	KANK1	NM_001354344	chr9	710976	711077	-4.12	1.34
1670	KANK1	NM_001354344	chr9	710976	711077	-4.12	1.34
1671	KANK1	NM_001354344	chr9	710976	711077	-4.12	1.34
1672	CSGALNACT1	NM_001354495	chr8	19263112	19263361	-9.06	1.34
1673	IVD	NM_001354597	chr15	40710423	40710524	-2.18	1.04
1674	ZBTB25	NM_001354686	chr14	64953598	64954143	-2.27	0.328
1675	ZBTB25	NM_001354687	chr14	64953598	64954144	-2.4	0.347
1676	XPC	NM_001354726	chr3	14214518	14220022	-2.33	-0.934
1677	ADD1	NM_001354761	chr4	2930604	2930755	-4.34	-1.36
1678	SMAD1	NM_001354817	chr4	146435864	146436014	-2.99	0.582
1679	MYC	NM_001354870	chr8	128753113	128753610	-5.3	0.583
1680	MYC	NM_001354870	chr8	128753113	128753610	-5.3	0.583
1681	MYC	NM_001354870	chr8	128753113	128753610	-5.3	0.583
1682	MYC	NM_001354870	chr8	128748373	128748771	-6.86	0.319
1683	MYC	NM_001354870	chr8	128748373	128748771	-6.86	0.319
1684	MYC	NM_001354870	chr8	128748373	128748771	-6.86	0.319
1685	MYC	NM_001354870	chr8	128750695	128751142	-7.21	1.09
1686	MYC	NM_001354870	chr8	128750695	128751142	-7.21	1.09
1687	MYC	NM_001354870	chr8	128750695	128751142	-7.21	1.09
1688	TP53BP1	NM_001355001	chr15	43708531	43712620	-3.21	-1.02
1689	PDGFRB	NM_001355017	chr5	149493901	149494152	-6.77	-1.65
1690	EGF	NM_001357021	chr4	110932550	110932699	-3.75	-1.3
1691	DHX15	NM_001358	chr4	24577946	24578046	-3.05	-0.85
1692	DLG4	NM_001365	chr17	7123269	7123369	-2.98	1.42
1693	DUSP4	NM_001394	chr8	29207421	29208168	-2.67	0.55
1694	DUSP4	NM_001394	chr8	29194805	29195925	-5.14	-1.46
1695	ECE1	NM_001397	chr1	21544338	21544889	-2.24	-0.779
1696	CELSR2	NM_001408	chr1	109793989	109794889	-2.57	-0.209
1697	CELSR2	NM_001408	chr1	109795237	109795588	-3.44	-0.624
1698	MEGF8	NM_001410	chr19	42880877	42881077	-4.19	-0.997
1699	EN2	NM_001427	chr7	155250873	155251722	-434	-0.776
1700	FOXC1	NM_001453	chr6	1611180	1611281	-3.86	0.916
1701	FOXO3	NM_001455	chr6	108985041	108985342	-2.94	0.995
1702	FOXO3	NM_001455	chr6	108882617	108882718	-2.4	1.93
1703	FOXO3	NM_001455	chr6	109001177	109001377	-2.79	0.794
1704	FOXO3	NM_001455	chr6	108882168	108882468	-8.65	1.71
1705	B4GALNT1	NM_001478	chr12	58020419	58020717	-2.18	-0.839
1706	MR1	NM_001531	chr1	181024557	181025006	-11.7	0.367
1707	IGSF3	NM_001542	chr1	117117318	117117519	-2.56	-1.47
1708	ACP2	NM_001610	chr11	47260902	47261202	-2.38	-0.693
1709	ADRBK1	NM_001619	chr11	67034019	67034268	-3.33	1.13
1710	AHNAK	NM_001620	chr11	62284371	62284472	-2.44	-1.14
1711	ALCAM	NM_001627	chr3	105085804	105086251	-8.2	1.93
1712	SHROOM2	NM_001649	chrX	9914833	9915134	-3.49	1.67
1713	ARL4D	NM_001661	chr17	41476451	41477811	-3.08	0.611
1714	ARVCF	NM_001670	chr22	19969001	19969202	-2.85	-0.83
1715	ARVCF	NM_001670	chr22	19957451	19957900	-6.43	-0.939
1716	BICD1	NM_001714	chr12	32259790	32260139	-2.35	0.838
1717	CENPB	NM_001810	chr20	3766439	3766839	-9.47	1.44
1718	SLC31A1	NM_001859	chr9	115983857	116018442	-2.17	1.51
1719	CSNK1D	NM_001893	chr17	80213433	80231495	-2.95	0.654
1720	CSPG4	NM_001897	chr15	75981949	75982150	-15.2	2.67
1721	CSPG4	NM_001897	chr15	75968310	75968610	-4.39	0.471
1722	DR1	NM_001938	chr1	93812020	93812366	-2.25	0.723
1723	DR1	NM_001938	chr1	93811526	93811922	-2.54	0.885
1724	DUSP7	NM_001947	chr3	52084726	52084876	-4.19	1.44
1725	DUSP7	NM_001947	chr3	52090211	52090411	-4.03	1.64
1726	E2F3	NM_001949	chr6	20402186	20480150	-2.97	0.636
1727	E2F3	NM_001949	chr6	20491068	20491267	-2.2	0.847
1728	EGF	NM_001963	chr4	110932534	110932685	-2.34	-0.82
1729	EIF5	NM_001969	chr14	103800588	103800916	-3.3	0.585
1730	ERCC1	NM_001983	chr19	45912579	45912928	-3.92	1.84
1731	F2R	NM_001992	chr5	76028628	76028728	-7.33	-2.19
1732	F2R	NM_001992	chr5	76030116	76030514	-2.96	-0.0422
1733	FGF2	NM_002006	chr4	123747962	123797478	-3.93	0.799
1734	FOXO1	NM_002015	chr13	41132843	41133917	-2.17	-0.0993
1735	FUT4	NM_002033	chr11	94277216	94278966	-4.12	0.455
1736	GAS1	NM_002048	chr9	89561557	89561955	-6.89	0.996
1737	GAS1	NM_002048	chr9	89560566	89561410	-10.6	0.748
1738	GOLGA4	NM_002078	chr3	37284831	37285081	-3.93	1.5
1739	GSPT1	NM_002094	chr16	12009228	12009775	-4.72	0.148
1740	HTT	NM_002111	chr4	3241744	3241894	-2.2	-0.9
1741	HTT	NM_002111	chr4	3245387	3245587	-2.6	0.0149
1742	HIVEP1	NM_002114	chr6	12161884	12162084	-4.57	-1.4
1743	NR4A1	NM_002135	chr12	52448239	52448687	-4.05	0.604
1744	INSM1	NM_002196	chr20	20350103	20350600	-3.8	0.186
1745	IVD	NM_002225	chr15	40710385	40710535	-2.29	0.957
1746	JUN	NM_002228	chr1	59247255	59249636	-2.74	0.231
1747	KIF3C	NM_002254	chr2	26150052	26150402	-3	-0.71
1748	LIMK1	NM_002314	chr7	73535561	73535811	-3.02	-0.889
1749	LRPAP1	NM_002337	chr4	3526766	3534074	-2.6	0.596
1750	LSAMP	NM_002338	chr3	116163736	116164086	-3.58	0.58
1751	MARCKS	NM_002356	chr6	114181189	114181932	-5.2	0.499
1752	MAFG	NM_002359	chr17	79880483	79885537	-4.26	1.02
1753	MAFK	NM_002360	chr7	1579729	1579930	-2.16	-0.844
1754	MAP1A	NM_002373	chr15	43823418	43823668	-3.03	-1.09
1755	MAP1A	NM_002373	chr15	43818341	43818891	-2.18	-0.35
1756	MARK3	NM_002376	chr14	103852095	103852343	-6.28	1.44
1757	MAZ	NM_002383	chr16	29818053	29818481	-4.36	0.807
1758	MC1R	NM_002386	chr16	89986684	89987035	-3.62	0.642
1759	MC1R	NM_002386	chr16	89985335	89985736	-2.35	0.779
1760	SLC3A2	NM_002394	chr11	62656155	62656255	-2.99	-0.723
1761	MAP3K3	NM_002401	chr17	61770979	61771528	-2.16	-0.6
1762	MGAT2	NM_002408	chr14	50087537	50088425	-4.39	0.784
1763	MKI67	NM_002417	chr10	129907198	129907499	-3.04	-0.453
1764	MKI67	NM_002417	chr10	129911741	129911842	-2.67	-0.713
1765	MKI67	NM_002417	chr10	129903200	129903301	-2.39	-0.572
1766	MMP15	NM_002428	chr16	58059819	58060220	-2.28	1.15
1767	MN1	NM_002430	chr22	28193558	28193659	-4.88	-1.16
1768	MN1	NM_002430	chr22	28192763	28192913	-3.79	-0.689
1769	MN1	NM_002430	chr22	28196889	28196989	-4.09	-0.9
1770	MN1	NM_002430	chr22	28193757	28193907	-2.51	-0.00599
1771	MN1	NM_002430	chr22	28193210	28193460	-8.74	-0.888
1772	MN1	NM_002430	chr22	28196292	28196393	-6.93	-1.6
1773	MTAP	NM_002451	chr9	21862141	21862490	-3.29	0.777
1774	MYC	NM_002467	chr8	128748374	128748772	-6.83	0.318
1775	MYC	NM_002467	chr8	128753111	128753609	-5.15	0.552
1776	MYC	NM_002467	chr8	128750693	128751141	-7.18	1.06
1777	PPP1R12B	NM_002481	chr1	202555305	202555555	-3.11	2.02
1778	NTHL1	NM_002528	chr16	2096235	2097773	-2.24	0.73
1779	PALM	NM_002579	chr19	746942	747191	-3.75	-0.914
1780	PALM	NM_002579	chr19	746348	746596	-2.46	-0.673
1781	PCDHGC3	NM_002588	chr5	140857905	140858005	-3.82	0.836
1782	PCDHGC3	NM_002588	chr5	140855618	140855768	-7.8	2.03
1783	PCDH7	NM_002589	chr4	30724783	30725134	-3.55	1.19
1784	PDE7A	NM_002603	chr8	66630904	66631005	-2.58	-1.14
1785	PDGFRB	NM_002609	chr5	149493898	149494247	-5.15	-1.24
1786	PHB	NM_002634	chr17	47481556	47481997	-4.05	0.959
1787	PLAG1	NM_002655	chr8	57073966	57074117	-4.12	-0.552
1788	PLAG1	NM_002655	chr8	57079307	57079957	-12.3	-0.914
1789	PLCG1	NM_002660	chr20	39803167	39803316	-2.71	-0.641
1790	PLXNB1	NM_002673	chr3	48445459	48445708	-4.06	-0.929
1791	POLG	NM_002693	chr15	89877066	89877926	-2.96	0.929
1792	POU2F1	NM_002697	chr1	167384920	167385519	-2.19	-0.306
1793	PRKACA	NM_002730	chr19	14218219	14228510	-2.35	1.25
1794	PRKCZ	NM_002744	chr1	2116069	2116491	-3.97	-1.98
1795	MAPK4	NM_002747	chr18	48255753	48256352	-8.54	0.0997
1796	PROX1	NM_002763	chr1	214170537	214170986	-3.72	1.23
1797	PSMD9	NM_002813	chr12	122326783	122332675	-2.18	0.684
1798	PTPN1	NM_002827	chr20	49127005	49177927	-2.65	0.881
1799	PTPRJ	NM_002843	chr11	48188794	48188945	-2.88	0.846
1800	PTPRZ1	NM_002851	chr7	121653530	121659213	-5.76	-0.72
1801	PTPRZ1	NM_002851	chr7	121652187	121652337	-4.1	-1.63
1802	PTPRZ1	NM_002851	chr7	121652585	121653083	-14.5	-1.79
1803	RBBP7	NM_002893	chrX	16888188	16888386	-2.16	0.888
1804	UPF1	NM_002911	chr19	18942843	18956832	-2.25	0.703
1805	REV3L	NM_002912	chr6	111696419	111696620	-2.15	0.887
1806	RGS12	NM_002926	chr4	3433254	3433654	-3.02	-0.855
1807	CLIP1	NM_002956	chr12	122862198	122862498	-2.3	-0.809
1808	SH3BP2	NM_003023	chr4	2835605	2835755	-3.24	1.02
1809	SHB	NM_003028	chr9	38016118	38069160	-6.58	0.79
1810	ST3GAL1	NM_003033	chr8	134488053	134488353	-5.34	0.0107
1811	ST3GAL1	NM_003033	chr8	134471421	134471920	-8.8	-1.17
1812	ST8SIA1	NM_003034	chr12	22486999	22487598	-4.08	-0.327
1813	ST8SIA1	NM_003034	chr12	22354094	22354494	-8.33	-0.576
1814	SLC6A6	NM_003043	chr3	14444175	14457939	-2.94	0.833
1815	SLC7A2	NM_003046	chr8	17422603	17422853	-3.07	0.717
1816	SLC16A1	NM_003051	chr1	113459855	113460351	-2.86	0.598
1817	SNAPC1	NM_003082	chr14	62229172	62233608	-2.36	-1.15
1818	SORD	NM_003104	chr15	45315449	45332607	-6.61	2.11
1819	SOX4	NM_003107	chr6	21594319	21597207	-6.02	0.232
1820	SP1	NM_003109	chr12	53776446	53776797	-2.31	-0.16
1821	SPTBN1	NM_003128	chr2	54858325	54858525	-2.19	-0.445
1822	SRF	NM_003131	chr6	43139131	43139824	-4.21	0.869
1823	SRP19	NM_003135	chr5	112203250	112203498	-2.5	0.746
1824	STIM1	NM_003156	chr11	3877281	3877581	-2.52	-0.739
1825	STXBP1	NM_003165	chr9	130374634	130413896	-3.04	1.23
1826	TCEA2	NM_003195	chr20	62694624	62694722	-2.3	1.15
1827	TCEB3	NM_003198	chr1	24077806	24078981	-2.86	0.699
1828	TERF1	NM_003218	chr8	73958287	73958438	-3.36	-1.57
1829	TGIF1	NM_003244	chr18	3457676	3457920	-2.75	-0.708
1830	TPM2	NM_003289	chr9	35689708	35689807	-3.98	0.514
1831	TSPYL1	NM_003309	chr6	116600833	116601032	-2.17	0.78
1832	TST	NM_003312	chr22	37414551	37414749	-4.58	1.68
1833	TST	NM_003312	chr22	37407294	37414354	-4.58	-1.77
1834	TTC3	NM_003316	chr21	38525526	38529105	-2.3	-0.869
1835	UBE2A	NM_003336	chrX	118708577	118708677	-2.26	1.23
1836	UBE2H	NM_003344	chr7	129592402	129592750	-4.63	0.454
1837	UCN	NM_003353	chr2	27530366	27531164	-3.36	-0.884
1838	VEGFA	NM_003376	chr6	43738291	43739034	-7.65	0.945
1839	CORO2A	NM_003389	chr9	100887001	100887151	-4.13	0.311
1840	WNT5A	NM_003392	chr3	55504125	55508609	-9.26	-0.696
1841	XPO1	NM_003400	chr2	61765268	61765368	-2.62	-0.709
1842	ZFX	NM_003410	chrX	24229352	24229502	-2.38	1.03
1843	ZNF268	NM_003415	chr12	133780621	133781366	-6.68	-0.786
1844	ZNF45	NM_003425	chr19	44417269	44417467	-2.42	-0.774
1845	ZNF91	NM_003430	chr19	23541245	23541745	-2.49	-0.194
1846	ZNF132	NM_003433	chr19	58946217	58946317	-3.32	-2.3
1847	ZNF132	NM_003433	chr19	58944478	58944678	-4.51	-1.15
1848	ZKSCAN1	NM_003439	chr7	99613274	99621117	-2.82	1.04
1849	ZKSCAN1	NM_003439	chr7	99633314	99633764	-3.13	0.917
1850	ZNF155	NM_003445	chr19	44501394	44501592	-2.25	-0.542
1851	FZD5	NM_003468	chr2	208631535	208632332	-4.91	0.983
1852	DEK	NM_003472	chr6	18264163	18264700	-2.76	1
1853	SLC7A5	NM_003486	chr16	87902857	87903006	-2.4	0.377
1854	NRIP1	NM_003489	chr21	16335841	16335942	-5.11	-2.86
1855	TRRAP	NM_003496	chr7	98609866	98610167	-4.01	0.588
1856	SNN	NM_003498	chr16	11770021	11770721	-2.32	-0.283
1857	SNN	NM_003498	chr16	11772765	11772915	-3.46	-1.08
1858	AXIN1	NM_003502	chr16	347915	348114	-4.78	1.2
1859	FZD1	NM_003505	chr7	90894932	90895383	-2.35	1
1860	FZD7	NM_003507	chr2	202899358	202900347	-3.1	0.82
1861	ZNF282	NM_003575	chr7	148895480	148895731	-2.94	0.645
1862	DYRK2	NM_003583	chr12	68042610	68051279	-2.41	0.408
1863	TPST2	NM_003595	chr22	26936832	26937231	-3.16	-1.06
1864	KLF11	NM_003597	chr2	10187998	10188596	-3.99	0.874
1865	CDC42BPA	NM_003607	chr1	227181697	227181848	-3.04	-1.11
1866	SLC43A1	NM_003627	chr11	57252400	57252550	-2.52	0.81
1867	CBX4	NM_003655	chr17	77807404	77813163	-7.65	0.333
1868	AGPS	NM_003659	chr2	178257570	178285038	-2.25	0.707
1869	DEGS1	NM_003676	chr1	224371007	224377559	-6.04	1.35
1870	PDXK	NM_003681	chr21	45181389	45181989	-2.61	0.902
1871	KLF7	NM_003709	chr2	207988530	208030441	-2.3	0.00553
1872	KLF7	NM_003709	chr2	207945496	207945896	-10.6	-1.23
1873	CDK13	NM_003718	chr7	39990008	39990457	-5.28	0.898
1874	PSMG1	NM_003720	chr21	40553769	40555291	-3.88	1.01
1875	UNC5C	NM_003728	chr4	96090190	96090440	-2.57	-0.798
1876	DCHS1	NM_003737	chr11	6651649	6651799	-3.77	-1.05
1877	DCHS1	NM_003737	chr11	6661059	6662305	-11.3	-1.02
1878	DCHS1	NM_003737	chr11	6648499	6648749	-3.38	-0.522
1879	DCHS1	NM_003737	chr11	6643301	6645543	-434	-0.913
1880	DCHS1	NM_003737	chr11	6642753	6642953	-4.71	-0.975
1881	DCHS1	NM_003737	chr11	6676880	6676980	-2.57	0.407
1882	DCHS1	NM_003737	chr11	6654160	6654260	-2.94	-1.33
1883	DCHS1	NM_003737	chr11	6653612	6653762	-3.03	-0.96
1884	DCHS1	NM_003737	chr11	6662453	6662902	-4.19	-0.32
1885	IRS2	NM_003749	chr13	110437464	110438264	-6.58	0.725
1886	IRS2	NM_003749	chr13	110438563	110438864	-5.3	1.05
1887	IRS2	NM_003749	chr13	110434615	110434716	-2.47	0.843
1888	IRS2	NM_003749	chr13	110435215	110435316	-2.67	1.26
1889	IRS2	NM_003749	chr13	110436314	110436465	-3.75	1.31
1890	IRS2	NM_003749	chr13	110436564	110436815	-5.16	1.02
1891	TRIM24	NM_003852	chr7	138145127	138189049	-4.42	-0.487
1892	BUD31	NM_003910	chr7	99017089	99017239	-2.18	0.722
1893	AP1S2	NM_003916	chrX	15870578	15872841	-3.53	1.65
1894	RAB7L1	NM_003929	chr1	205738495	205738693	-3.65	0.99
1895	BAIAP3	NM_003933	chr16	1399242	1399442	-2.19	0.181
1896	CDK5R2	NM_003936	chr2	219825588	219825836	-4.06	3.72
1897	WASL	NM_003941	chr7	123388724	123388975	-4.44	1.11
1898	FAM47E-STBD1	NM_003943	chr4	77227915	77230513	-3.29	-0.0816
1899	BRSK2	NM_003957	chr11	1483718	1483869	-3.1	-1.56
1900	UBE2M	NM_003969	chr19	59069654	59070245	-4.05	0.481
1901	ADCY3	NM_004036	chr2	25042386	25044411	-3.41	-0.642
1902	RHOB	NM_004040	chr2	20646930	20647079	-2.96	0.756
1903	RHOB	NM_004040	chr2	20648363	20648562	-2.29	-0.346
1904	BCL2L2	NM_004050	chr14	23777093	23777340	-2.17	0.864
1905	BNIP3	NM_004052	chr10	133795269	133795369	-4.64	1.72
1906	CDKN1B	NM_004064	chr12	12870796	12871801	-2.37	-0.494
1907	CRY1	NM_004075	chr12	107486886	107487286	-3.1	0.881
1908	E2F2	NM_004091	chr1	23836064	23836514	-2.16	0.11
1909	PRKAR2A	NM_004157	chr3	48885033	48885233	-2.87	1.84
1910	PRKAR2A	NM_004157	chr3	48788842	48788992	-3.07	1.04
1911	RAB1A	NM_004161	chr2	65315482	65315583	-2.85	-1.29
1912	SLC9A3	NM_004174	chr5	473387	475761	-2.98	0.893
1913	SLC9A3	NM_004174	chr5	472298	473041	-3.05	1.03
1914	SNRPD3	NM_004175	chr22	24951666	24951766	-4.81	2.69
1915	USP2	NM_004205	chr11	119243588	119243938	-2.38	0.141
1916	CD83	NM_004233	chr6	14135810	14136207	-2.57	0.276
1917	COPS2	NM_004236	chr15	49419812	49420261	-2.27	-0.526
1918	HMGN3	NM_004242	chr6	79911203	79911349	-3.37	1.17
1919	RECQL5	NM_004259	chr17	73657140	73658895	-5.15	-1.54
1920	CHST3	NM_004273	chr10	73767395	73768541	-3.31	0.845
1921	RAB3D	NM_004283	chr19	11435602	11435901	-2.77	-1.2
1922	TRAF4	NM_004295	chr17	27076352	27076747	-4.93	-0.904
1923	ACVR1B	NM_004302	chr12	52387985	52388482	-2.5	-0.271
1924	ARRB2	NM_004313	chr17	4613985	4619443	-2.78	1.21
1925	ASPH	NM_004318	chr8	62626898	62627049	-2.23	0.683
1926	BCL9	NM_004326	chr1	147096222	147096872	-2.56	-0.499
1927	BCR	NM_004327	chr22	23522800	23524346	-4.74	1.12
1928	VCAN	NM_004385	chr5	82817907	82833453	-8.43	-0.834
1929	VCAN	NM_004385	chr5	82836493	82836744	-2.39	-0.851
1930	VCAN	NM_004385	chr5	82815963	82816113	-4.14	-1.17
1931	DAP	NM_004394	chr5	10761187	10761287	-3.01	1.07
1932	TRDMT1	NM_004412	chr10	17184172	17184622	-6.02	-1.06
1933	EPHA2	NM_004431	chr1	16475273	16475374	-5.01	-0.747
1934	EPHA2	NM_004431	chr1	16477420	16482504	-2.28	-0.592
1935	EPHB3	NM_004443	chr3	184299401	184299650	-2.48	1.29
1936	ERBB2	NM_004448	chr17	37884015	37884765	-5.39	-0.645
1937	FGD1	NM_004463	chrX	54521654	54521754	-2.23	1.29
1938	GOLGB1	NM_004487	chr3	121383095	121383346	-4.43	-1.12
1939	GOLGB1	NM_004487	chr3	121416492	121416593	-2.37	1.45
1940	ARHGAP35	NM_004491	chr19	47503789	47504738	-2.34	-0.562
1941	KCNQ2	NM_004518	chr20	62037452	62038700	-434	-0.485
1942	KCNQ2	NM_004518	chr20	62033212	62033562	-5.12	-0.587
1943	KIF5B	NM_004521	chr10	32344921	32345271	-2.76	0.64
1944	MMP2	NM_004530	chr16	55513230	55516856	-2.9	0.671
1945	NFATC4	NM_004554	chr14	24837374	24839130	-2.59	0.0809
1946	PEX14	NM_004565	chr1	10687413	10690124	-3.06	-0.821
1947	XPC	NM_004628	chr3	14214520	14220023	-2.16	-0.872
1948	AXIN2	NM_004655	chr17	63553981	63554529	-2.63	0.418
1949	LATS1	NM_004690	chr6	150004880	150005229	-3.76	0.554
1950	CTDP1	NM_004715	chr18	77474597	77475387	-3.43	0.763
1951	MAP3K13	NM_004721	chr3	185191062	185191262	-3.25	-1.57
1952	LRRFIP1	NM_004735	chr2	238671328	238671528	-4.09	1.03
1953	LRRFIP1	NM_004735	chr2	238672520	238672770	-3.69	0.694
1954	MAGI1	NM_004742	chr3	65415296	65415696	-3.22	-0.447
1955	DLG5	NM_004747	chr10	79551396	79551795	-2.48	-0.874
1956	DLG5	NM_004747	chr10	79551944	79552194	-7.94	-1.33
1957	RPS6KA5	NM_004755	chr14	91338002	91338252	-3.19	-0.353
1958	ITGB1BP1	NM_004763	chr2	9558809	9563549	-4.64	1.53
1959	ITGB1BP1	NM_004763	chr2	9545958	9546108	-2.5	-0.942
1960	PPIG	NM_004792	chr2	170493614	170493762	-4.17	-0.729
1961	HS6ST1	NM_004807	chr2	129024584	129024733	-2.22	-0.588
1962	ARHGAP29	NM_004815	chr1	94639443	94640192	-5.55	0.334
1963	MED26	NM_004831	chr19	16687159	16687906	-3.47	0.667
1964	ONECUT2	NM_004852	chr18	55145353	55146052	-2.22	0.388
1965	LITAF	NM_004862	chr16	11643216	11643317	-3.02	-0.718
1966	SPTLC2	NM_004863	chr14	78063694	78082911	-4.37	1.37
1967	BAG5	NM_004873	chr14	104026158	104026755	-2.43	0.96
1968		NM_004892	chr1	145096456	145096605	-3.18	1.44
1969	ENTPD4	NM_004901	chr8	23294542	23294693	-3.52	-0.859
1970	WTAP	NM_004906	chr6	160169353	160174543	-3.75	-1.38
1971	VPS9D1	NM_004913	chr16	89787293	89787394	-5.53	2.31
1972	CTNS	NM_004937	chr17	3558538	3559822	-6.22	-2.45
1973	DMWD	NM_004943	chr19	46287102	46287399	-4.21	-0.887
1974	MTOR	NM_004958	chr1	11319337	11322558	-2.17	0.871
1975	KCNC1	NM_004976	chr11	17757644	17758094	-4.26	3.18
1976	MYO6	NM_004999	chr6	76624574	76624724	-2.3	-0.956
1977	ROR1	NM_005012	chr1	64644450	64644550	-2.15	-3.45
1978	PPARA	NM_005036	chr22	46631154	46631605	-3.72	0.577
1979	SLC12A4	NM_005072	chr16	67977971	67978568	-2.84	-0.725
1980	TLE3	NM_005078	chr15	70389306	70390156	-4.46	0.671
1981	TRIM25	NM_005082	chr17	54969214	54969465	-4.2	1.15
1982	ZMYM4	NM_005095	chr1	35885296	35885697	-4.07	-0.691
1983	ADAMTS4	NM_005099	chr1	161160767	161161168	-8.65	0.535
1984	EXOG	NM_005107	chr3	38565549	38565849	-2.61	-0.871
1985	NUP153	NM_005124	chr6	17706565	17707065	-2.8	0.937
1986	SCO2	NM_005138	chr22	50962145	50962640	-12.9	0.904
1987	DNAJA3	NM_005147	chr16	4505739	4505888	-4.17	1.36
1988	ABL1	NM_005157	chr9	133760373	133761817	-2.51	0.519
1989	ATF1	NM_005171	chr12	51213567	51213765	-4.15	1.4
1990	CEBPD	NM_005195	chr8	48649619	48650245	-2.87	0.751
1991	CRK	NM_005206	chr17	1326272	1326371	-2.66	-0.823
1992	CRK	NM_005206	chr17	1326469	1326617	-2.28	-1.02
1993	CRKL	NM_005207	chr22	21272161	21288292	-2.22	0.436
1994	DIAPH1	NM_005219	chr5	140966749	140998522	-3.62	1.24
1995	DNASE1	NM_005223	chr16	3704587	3704988	-2.28	-0.446
1996	ARID3A	NM_005224	chr19	972309	972409	-4.84	-1.51
1997	ELK1	NM_005229	chrX	47500808	47509904	-2.58	1.04
1998	ERBB4	NM_005235	chr2	212989607	213403352	-10.3	-2.51
[truncated: 1,937 more rows]
